# Supplementary material
Source: MDPI journal article supplement (https://www.mdpi.com/2304-6740/8/1/4)

# checkCIF/PLATON report

Structure factors have been supplied for datablock(s) isn165\_130k

THIS REPORT IS FOR GUIDANCE ONLY. IF USED AS PART OF A REVIEW PROCEDURE FOR PUBLICATION, IT SHOULD NOT REPLACE THE EXPERTISE OF AN EXPERIENCED CRYSTALLOGRAPHIC REFEREE.

No syntax errors found.      CIF dictionary      Interpreting this report

## Datablock: isn165\_130k

---

Bond precision:    C-C = 0.0092 Å                      Wavelength=1.34143

Cell:                      a=10.9300(4)                      b=14.2927(6)                      c=19.2894(8)  
                                    alpha=70.366(3)                      beta=86.491(3)                      gamma=73.206(3)  
Temperature:    130 K

|                        | Calculated                                            | Reported                                                |
|------------------------|-------------------------------------------------------|---------------------------------------------------------|
| Volume                 | 2715.0(2)                                             | 2715.0(2)                                               |
| Space group            | P -1                                                  | P -1                                                    |
| Hall group             | -P 1                                                  | -P 1                                                    |
| Moiety formula         | C51 H38 Br2 Cu N2 O P2, F6<br>P, C H2 Cl2 [+ solvent] | C51 H38 Br2 Cu N2 O P2, F6<br>P, C H2 Cl2, 0.9[C4H10O1] |
| Sum formula            | C52 H40 Br2 Cl2 Cu F6 N2 O<br>P3 [+ solvent]          | C55.60 H49 Br2 Cl2 Cu F6<br>N2 O1.90 P3                 |
| Mr                     | 1210.02                                               | 1276.74                                                 |
| Dx, g cm <sup>-3</sup> | 1.480                                                 | 1.562                                                   |
| Z                      | 2                                                     | 2                                                       |
| Mu (mm <sup>-1</sup> ) | 4.792                                                 | 4.864                                                   |
| F000                   | 1212.0                                                | 1288.0                                                  |
| F000'                  | 1207.75                                               |                                                         |
| h,k,lmax               | 13,17,24                                              | 13,17,24                                                |
| Nref                   | 11131                                                 | 10645                                                   |
| Tmin,Tmax              | 0.506,0.482                                           | 0.002,0.794                                             |
| Tmin'                  | 0.459                                                 |                                                         |

Correction method= # Reported T Limits: Tmin=0.002 Tmax=0.794  
AbsCorr = MULTI-SCAN

Data completeness= 0.956                      Theta(max)= 57.052

R(reflections)= 0.0858( 9958)                      wR2(reflections)= 0.2384( 10645)

S = 1.059                      Npar= 624

---

The following ALERTS were generated. Each ALERT has the format

**test-name\_ALERT\_alert-type\_alert-level.**

Click on the hyperlinks for more details of the test.

### ● Alert level C

|                   |               |                                            |         |        |
|-------------------|---------------|--------------------------------------------|---------|--------|
| PLAT244_ALERT_4_C | Low           | 'Solvent' Ueq as Compared to Neighbors of  | C52     | Check  |
| PLAT250_ALERT_2_C | Large         | U3/U1 Ratio for Average U(i,j) Tensor .... | 2.1     | Note   |
| PLAT250_ALERT_2_C | Large         | U3/U1 Ratio for Average U(i,j) Tensor .... | 2.2     | Note   |
| PLAT260_ALERT_2_C | Large         | Average Ueq of Residue Including C11       | 0.102   | Check  |
| PLAT341_ALERT_3_C | Low           | Bond Precision on C-C Bonds .....          | 0.00915 | Ang.   |
| PLAT906_ALERT_3_C | Large         | K Value in the Analysis of Variance .....  | 2.674   | Check  |
| PLAT911_ALERT_3_C | Missing       | FCF Refl Between Thmin & STh/L= 0.600      | 101     | Report |
| PLAT918_ALERT_3_C | Reflection(s) | with I(obs) much Smaller I(calc) .         | 24      | Check  |
| PLAT977_ALERT_2_C | Check         | Negative Difference Density on H52A        | -0.39   | eA-3   |
| PLAT978_ALERT_2_C | Number        | C-C Bonds with Positive Residual Density.  | 0       | Info   |

### ● Alert level G

FORMU01\_ALERT\_2\_G There is a discrepancy between the atom counts in the  
 \_chemical\_formula\_sum and the formula from the \_atom\_site\* data.  
 Atom count from \_chemical\_formula\_sum: C55.6 H49 Br2 Cl2 Cu1 F6 N2 O1.9  
 Atom count from the \_atom\_site data: C52 H40 Br2 Cl2 Cu1 F6 N2 O1 P3

ABSMU01\_ALERT\_1\_G Calculation of \_exptl\_absorpt\_correction\_mu  
 not performed for this radiation type.

CELLZ01\_ALERT\_1\_G Difference between formula and atom\_site contents detected.

CELLZ01\_ALERT\_1\_G ALERT: Large difference may be due to a  
 symmetry error - see SYMMG tests

From the CIF: \_cell\_formula\_units\_Z 2

From the CIF: \_chemical\_formula\_sum C55.60 H49 Br2 Cl2 Cu F6 N2 O1.90

TEST: Compare cell contents of formula and atom\_site data

| atom | Z*formula | cif sites | diff  |
|------|-----------|-----------|-------|
| C    | 111.20    | 104.00    | 7.20  |
| H    | 98.00     | 80.00     | 18.00 |
| Br   | 4.00      | 4.00      | 0.00  |
| Cl   | 4.00      | 4.00      | 0.00  |
| Cu   | 2.00      | 2.00      | 0.00  |
| F    | 12.00     | 12.00     | 0.00  |
| N    | 4.00      | 4.00      | 0.00  |
| O    | 3.80      | 2.00      | 1.80  |
| P    | 6.00      | 6.00      | 0.00  |

|                   |                                                  |                |        |       |
|-------------------|--------------------------------------------------|----------------|--------|-------|
| PLAT041_ALERT_1_G | Calc. and Reported SumFormula                    | Strings Differ | Please | Check |
| PLAT051_ALERT_1_G | Mu(calc) and Mu(CIF) Ratio Differs from 1.0 by . | 1.47 %         |        |       |
| PLAT068_ALERT_1_G | Reported F000 Differs from Calcd (or Missing)... | Please         | Check  |       |
| PLAT072_ALERT_2_G | SHELXL First Parameter in WGHT Unusually Large   | 0.14           | Report |       |
| PLAT083_ALERT_2_G | SHELXL Second Parameter in WGHT Unusually Large  | 6.65           | Why ?  |       |
| PLAT154_ALERT_1_G | The s.u.'s on the Cell Angles are Equal ..(Note) | 0.003          | Degree |       |
| PLAT244_ALERT_4_G | Low 'Solvent' Ueq as Compared to Neighbors of    | P3             | Check  |       |
| PLAT605_ALERT_4_G | Largest Solvent Accessible VOID in the Structure | 363            | A**3   |       |
| PLAT720_ALERT_4_G | Number of Unusual/Non-Standard Labels .....      | 6              | Note   |       |
| PLAT802_ALERT_4_G | CIF Input Record(s) with more than 80 Characters | 1              | Info   |       |
| PLAT868_ALERT_4_G | ALERTS Due to the Use of _smtbx_masks Suppressed | !              | Info   |       |
| PLAT910_ALERT_3_G | Missing # of FCF Reflection(s) Below Theta(Min). | 1              | Note   |       |
| PLAT912_ALERT_4_G | Missing # of FCF Reflections Above STh/L= 0.600  | 384            | Note   |       |
| PLAT961_ALERT_5_G | Dataset Contains no Negative Intensities .....   | Please         | Check  |       |
| PLAT984_ALERT_1_G | The C-f'= 0.0148 Deviates from the B&C-Value     | 0.0137         | Check  |       |
| PLAT984_ALERT_1_G | The Br-f'= -0.9501 Deviates from the B&C-Value   | -0.9338        | Check  |       |
| PLAT984_ALERT_1_G | The Cu-f'= -2.9183 Deviates from the B&C-Value   | -2.7974        | Check  |       |
| PLAT984_ALERT_1_G | The F-f'= 0.0600 Deviates from the B&C-Value     | 0.0583         | Check  |       |
| PLAT984_ALERT_1_G | The N-f'= 0.0253 Deviates from the B&C-Value     | 0.0241         | Check  |       |

|                   |                                 |        |                             |        |       |
|-------------------|---------------------------------|--------|-----------------------------|--------|-------|
| PLAT984_ALERT_1_G | The O-f' =                      | 0.0412 | Deviates from the B&C-Value | 0.0389 | Check |
| PLAT984_ALERT_1_G | The P-f' =                      | 0.2596 | Deviates from the B&C-Value | 0.2543 | Check |
| PLAT985_ALERT_1_G | The Br-f" =                     | 1.0411 | Deviates from the B&C-Value | 1.0006 | Check |
| PLAT985_ALERT_1_G | The Cu-f" =                     | 3.6937 | Deviates from the B&C-Value | 3.6876 | Check |
| PLAT985_ALERT_1_G | The F-f" =                      | 0.0411 | Deviates from the B&C-Value | 0.0400 | Check |
| PLAT985_ALERT_1_G | The P-f" =                      | 0.3354 | Deviates from the B&C-Value | 0.3332 | Check |
| PLAT992_ALERT_5_G | Repd & Actual _reflns_number_gt |        | Values Differ by            | 1      | Check |

---

0 **ALERT level A** = Most likely a serious problem - resolve or explain  
0 **ALERT level B** = A potentially serious problem, consider carefully  
10 **ALERT level C** = Check. Ensure it is not caused by an omission or oversight  
30 **ALERT level G** = General information/check it is not something unexpected

18 ALERT type 1 CIF construction/syntax error, inconsistent or missing data  
8 ALERT type 2 Indicator that the structure model may be wrong or deficient  
5 ALERT type 3 Indicator that the structure quality may be low  
7 ALERT type 4 Improvement, methodology, query or suggestion  
2 ALERT type 5 Informative message, check

---

## Validation response form

Please find below a validation response form (VRF) that can be filled in and pasted into your CIF.

```
# start Validation Reply Form
_vrf_PLAT244_isn165_130k
;
PROBLEM: Low      'Solvent' Ueq as Compared to Neighbors of      C52 Check
RESPONSE: ...
;
_vrf_PLAT250_isn165_130k
;
PROBLEM: Large U3/U1 Ratio for Average U(i,j) Tensor ....      2.1 Note
RESPONSE: ...
;
_vrf_PLAT260_isn165_130k
;
PROBLEM: Large Average Ueq of Residue Including      C11      0.102 Check
RESPONSE: ...
;
_vrf_PLAT341_isn165_130k
;
PROBLEM: Low Bond Precision on  C-C Bonds .....      0.00915 Ang.
RESPONSE: ...
;
_vrf_PLAT906_isn165_130k
;
PROBLEM: Large K Value in the Analysis of Variance .....      2.674 Check
RESPONSE: ...
;
_vrf_PLAT911_isn165_130k
;
PROBLEM: Missing FCF Refl Between Thmin & STh/L=      0.600      101 Report
RESPONSE: ...
;
_vrf_PLAT918_isn165_130k
;
PROBLEM: Reflection(s) with I(obs) much Smaller I(calc) .      24 Check
RESPONSE: ...
;
```

```
_vrf_PLAT977_isn165_130k
;
PROBLEM: Check Negative Difference Density on H52A          -0.39 eA-3
RESPONSE: ...
;
_vrf_PLAT978_isn165_130k
;
PROBLEM: Number C-C Bonds with Positive Residual Density.    0 Info
RESPONSE: ...
;
# end Validation Reply Form
```

---

It is advisable to attempt to resolve as many as possible of the alerts in all categories. Often the minor alerts point to easily fixed oversights, errors and omissions in your CIF or refinement strategy, so attention to these fine details can be worthwhile. In order to resolve some of the more serious problems it may be necessary to carry out additional measurements or structure refinements. However, the purpose of your study may justify the reported deviations and the more serious of these should normally be commented upon in the discussion or experimental section of a paper or in the "special\_details" fields of the CIF. checkCIF was carefully designed to identify outliers and unusual parameters, but every test has its limitations and alerts that are not important in a particular case may appear. Conversely, the absence of alerts does not guarantee there are no aspects of the results needing attention. It is up to the individual to critically assess their own results and, if necessary, seek expert advice.

### **Publication of your CIF in IUCr journals**

A basic structural check has been run on your CIF. These basic checks will be run on all CIFs submitted for publication in IUCr journals (*Acta Crystallographica*, *Journal of Applied Crystallography*, *Journal of Synchrotron Radiation*); however, if you intend to submit to *Acta Crystallographica Section C* or *E* or *IUCrData*, you should make sure that full publication checks are run on the final version of your CIF prior to submission.

### **Publication of your CIF in other journals**

Please refer to the *Notes for Authors* of the relevant journal for any special instructions relating to CIF submission.

---

**PLATON version of 07/08/2019; check.def file version of 30/07/2019**

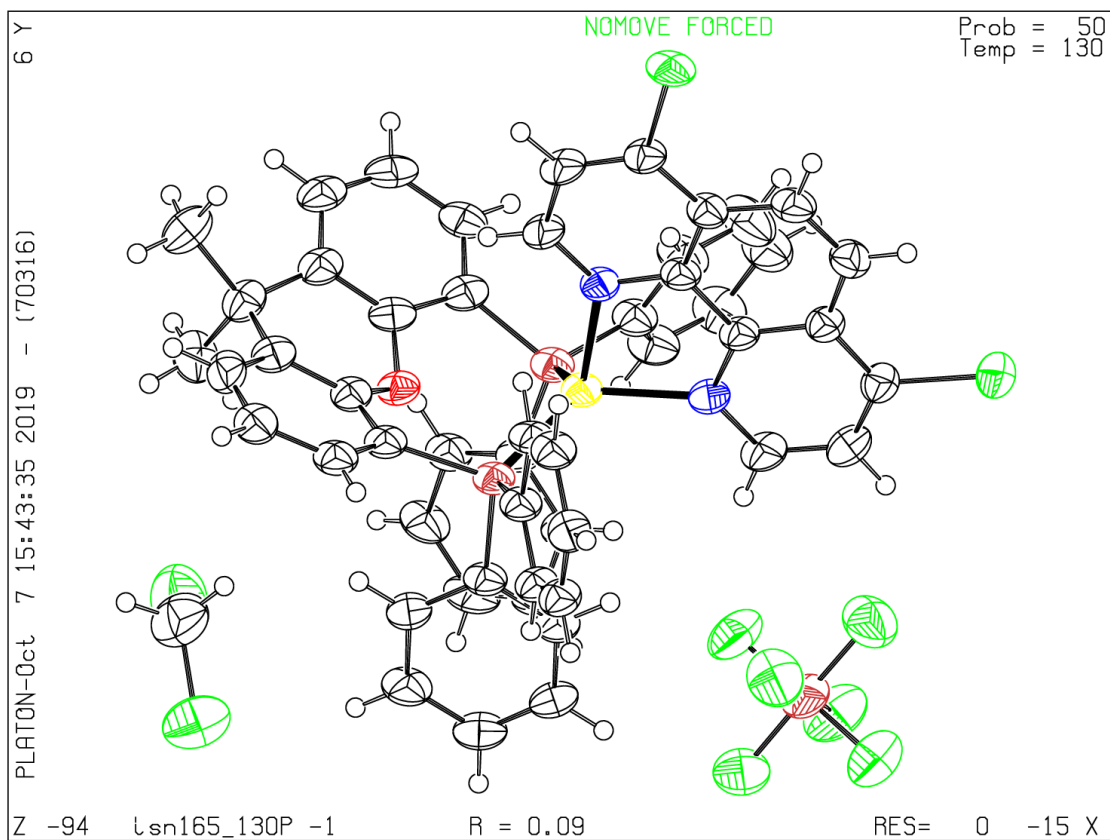

Supplement: s1 [file s1]
