# Supplementary material
Source: MDPI journal article supplement (https://www.mdpi.com/2304-6740/8/1/4)

# checkCIF/PLATON report

You have not supplied any structure factors. As a result the full set of tests cannot be run.

THIS REPORT IS FOR GUIDANCE ONLY. IF USED AS PART OF A REVIEW PROCEDURE FOR PUBLICATION, IT SHOULD NOT REPLACE THE EXPERTISE OF AN EXPERIENCED CRYSTALLOGRAPHIC REFEREE.

No syntax errors found.      CIF dictionary      Interpreting this report

## Datablock: isn163\_130k\_0m

---

|                        |                                             |                                                        |
|------------------------|---------------------------------------------|--------------------------------------------------------|
| Bond precision:        | C-C = 0.0107 Å                              | Wavelength=1.54178                                     |
| Cell:                  | a=12.9120(7)                                | b=14.0896(8)      c=27.1332(13)                        |
|                        | alpha=90                                    | beta=94.491(2)      gamma=90                           |
| Temperature:           | 130 K                                       |                                                        |
|                        | Calculated                                  | Reported                                               |
| Volume                 | 4921.1(5)                                   | 4921.0(5)                                              |
| Space group            | P 2/c                                       | P 1 2/c 1                                              |
| Hall group             | -P 2yc                                      | -P 2yc                                                 |
| Moiety formula         | C48 H34 Br2 Cu N2 O P2, F6<br>P [+ solvent] | C48 H34 Br2 Cu N2 O P2, F6<br>P, 0.8[CH2CL2], 0.9[H2O] |
| Sum formula            | C48 H34 Br2 Cu F6 N2 O P3<br>[+ solvent]    | C48.80 H37.40 Br2 Cl1.60<br>Cu F6 N2 O1.90 P3          |
| Mr                     | 1085.03                                     | 1169.20                                                |
| Dx, g cm <sup>-3</sup> | 1.464                                       | 1.578                                                  |
| Z                      | 4                                           | 4                                                      |
| Mu (mm <sup>-1</sup> ) | 3.957                                       | 4.797                                                  |
| F000                   | 2168.0                                      | 2338.0                                                 |
| F000'                  | 2163.70                                     |                                                        |
| h,k,lmax               | 15,17,33                                    | 15,17,32                                               |
| Nref                   | 9319                                        | 8930                                                   |
| Tmin,Tmax              | 0.497,0.825                                 | 0.591,0.753                                            |
| Tmin'                  | 0.421                                       |                                                        |

Correction method= # Reported T Limits: Tmin=0.591 Tmax=0.753  
AbsCorr = MULTI-SCAN

Data completeness= 0.958      Theta(max)= 69.862

R(reflections)= 0.0870( 8307)      wR2(reflections)= 0.2516( 8930)

S = 1.122      Npar= 556

---

The following ALERTS were generated. Each ALERT has the format

**test-name\_ALERT\_alert-type\_alert-level.**

Click on the hyperlinks for more details of the test.

## ● Alert level C

PLAT260\_ALERT\_2\_C Large Average Ueq of Residue Including P3 0.174 Check  
 PLAT341\_ALERT\_3\_C Low Bond Precision on C-C Bonds ..... 0.01067 Ang.

## ● Alert level G

FORMU01\_ALERT\_1\_G There is a discrepancy between the atom counts in the  
 \_chemical\_formula\_sum and \_chemical\_formula\_moiety. This is  
 usually due to the moiety formula being in the wrong format.

Atom count from \_chemical\_formula\_sum: C48.8 H37.4 Br2 Cl1.6 Cu1 F6

Atom count from \_chemical\_formula\_moiety: C48.8 H35.6 Br2 Cl1.6 Cu1 F6

FORMU01\_ALERT\_2\_G There is a discrepancy between the atom counts in the  
 \_chemical\_formula\_sum and the formula from the \_atom\_site\* data.

Atom count from \_chemical\_formula\_sum: C48.8 H37.4 Br2 Cl1.6 Cu1 F6 N2

Atom count from the \_atom\_site data: C48 H34 Br2 Cu1 F6 N2 O1 P3

CELLZ01\_ALERT\_1\_G Difference between formula and atom\_site contents detected.

CELLZ01\_ALERT\_1\_G ALERT: Large difference may be due to a

symmetry error - see SYMMG tests

From the CIF: \_cell\_formula\_units\_Z 4

From the CIF: \_chemical\_formula\_sum C48.80 H37.40 Br2 Cl1.60 Cu F6 N2

TEST: Compare cell contents of formula and atom\_site data

| atom | Z*formula | cif sites | diff  |
|------|-----------|-----------|-------|
| C    | 195.20    | 192.00    | 3.20  |
| H    | 149.60    | 136.00    | 13.60 |
| Br   | 8.00      | 8.00      | 0.00  |
| Cl   | 6.40      | 0.00      | 6.40  |
| Cu   | 4.00      | 4.00      | 0.00  |
| F    | 24.00     | 24.00     | 0.00  |
| N    | 8.00      | 8.00      | 0.00  |
| O    | 7.60      | 4.00      | 3.60  |
| P    | 12.00     | 12.00     | 0.00  |

PLAT002\_ALERT\_2\_G Number of Distance or Angle Restraints on AtSite 13 Note  
 PLAT003\_ALERT\_2\_G Number of Uiso or Uij Restrained non-H Atoms ... 6 Report  
 PLAT041\_ALERT\_1\_G Calc. and Reported SumFormula Strings Differ Please Check  
 PLAT051\_ALERT\_1\_G Mu(calc) and Mu(CIF) Ratio Differs from 1.0 by . 17.51 %  
 PLAT068\_ALERT\_1\_G Reported F000 Differs from Calcd (or Missing)... Please Check  
 PLAT072\_ALERT\_2\_G SHELXL First Parameter in WGHT Unusually Large 0.12 Report  
 PLAT083\_ALERT\_2\_G SHELXL Second Parameter in WGHT Unusually Large 31.63 Why ?  
 PLAT171\_ALERT\_4\_G The CIF-Embedded .res File Contains EADP Records 1 Report  
 PLAT176\_ALERT\_4\_G The CIF-Embedded .res File Contains SADI Records 3 Report  
 PLAT186\_ALERT\_4\_G The CIF-Embedded .res File Contains ISOR Records 1 Report  
 PLAT231\_ALERT\_4\_G Hirshfeld Test (Solvent) P3 --F1 . 24.6 s.u.  
 PLAT231\_ALERT\_4\_G Hirshfeld Test (Solvent) P3 --F2 . 9.4 s.u.  
 PLAT231\_ALERT\_4\_G Hirshfeld Test (Solvent) P3 --F3 . 15.2 s.u.  
 PLAT231\_ALERT\_4\_G Hirshfeld Test (Solvent) P3 --F4 . 24.6 s.u.  
 PLAT231\_ALERT\_4\_G Hirshfeld Test (Solvent) P3 --F5 . 9.2 s.u.  
 PLAT231\_ALERT\_4\_G Hirshfeld Test (Solvent) P3 --F6 . 15.6 s.u.  
 PLAT244\_ALERT\_4\_G Low Solvent Ueq as Compared to Neighbors of P3 Check  
 PLAT300\_ALERT\_4\_G Atom Site Occupancy of Br1 Constrained at 0.85 Check  
 PLAT300\_ALERT\_4\_G Atom Site Occupancy of Br2 Constrained at 0.8 Check  
 PLAT300\_ALERT\_4\_G Atom Site Occupancy of Br3 Constrained at 0.15 Check  
 PLAT300\_ALERT\_4\_G Atom Site Occupancy of Br4 Constrained at 0.2 Check  
 PLAT301\_ALERT\_3\_G Main Residue Disorder .....(Resd 1 ) 4% Note  
 PLAT605\_ALERT\_4\_G Largest Solvent Accessible VOID in the Structure 651 A\*\*3  
 PLAT802\_ALERT\_4\_G CIF Input Record(s) with more than 80 Characters 1 Info

|                   |                                                  |     |      |
|-------------------|--------------------------------------------------|-----|------|
| PLAT860_ALERT_3_G | Number of Least-Squares Restraints .....         | 123 | Note |
| PLAT868_ALERT_4_G | ALERTS Due to the Use of _smtbx_masks Suppressed | !   | Info |
| PLAT933_ALERT_2_G | Number of OMIT Records in Embedded .res File ... | 6   | Note |

---

|    |                      |                                                              |
|----|----------------------|--------------------------------------------------------------|
| 0  | <b>ALERT level A</b> | = Most likely a serious problem - resolve or explain         |
| 0  | <b>ALERT level B</b> | = A potentially serious problem, consider carefully          |
| 2  | <b>ALERT level C</b> | = Check. Ensure it is not caused by an omission or oversight |
| 31 | <b>ALERT level G</b> | = General information/check it is not something unexpected   |

  

|    |              |                                                              |
|----|--------------|--------------------------------------------------------------|
| 6  | ALERT type 1 | CIF construction/syntax error, inconsistent or missing data  |
| 7  | ALERT type 2 | Indicator that the structure model may be wrong or deficient |
| 3  | ALERT type 3 | Indicator that the structure quality may be low              |
| 17 | ALERT type 4 | Improvement, methodology, query or suggestion                |
| 0  | ALERT type 5 | Informative message, check                                   |

---

It is advisable to attempt to resolve as many as possible of the alerts in all categories. Often the minor alerts point to easily fixed oversights, errors and omissions in your CIF or refinement strategy, so attention to these fine details can be worthwhile. In order to resolve some of the more serious problems it may be necessary to carry out additional measurements or structure refinements. However, the purpose of your study may justify the reported deviations and the more serious of these should normally be commented upon in the discussion or experimental section of a paper or in the "special\_details" fields of the CIF. checkCIF was carefully designed to identify outliers and unusual parameters, but every test has its limitations and alerts that are not important in a particular case may appear. Conversely, the absence of alerts does not guarantee there are no aspects of the results needing attention. It is up to the individual to critically assess their own results and, if necessary, seek expert advice.

### Publication of your CIF in IUCr journals

A basic structural check has been run on your CIF. These basic checks will be run on all CIFs submitted for publication in IUCr journals (*Acta Crystallographica*, *Journal of Applied Crystallography*, *Journal of Synchrotron Radiation*); however, if you intend to submit to *Acta Crystallographica Section C* or *E* or *IUCrData*, you should make sure that full publication checks are run on the final version of your CIF prior to submission.

### Publication of your CIF in other journals

Please refer to the *Notes for Authors* of the relevant journal for any special instructions relating to CIF submission.

---

**PLATON version of 22/12/2019; check.def file version of 13/12/2019**

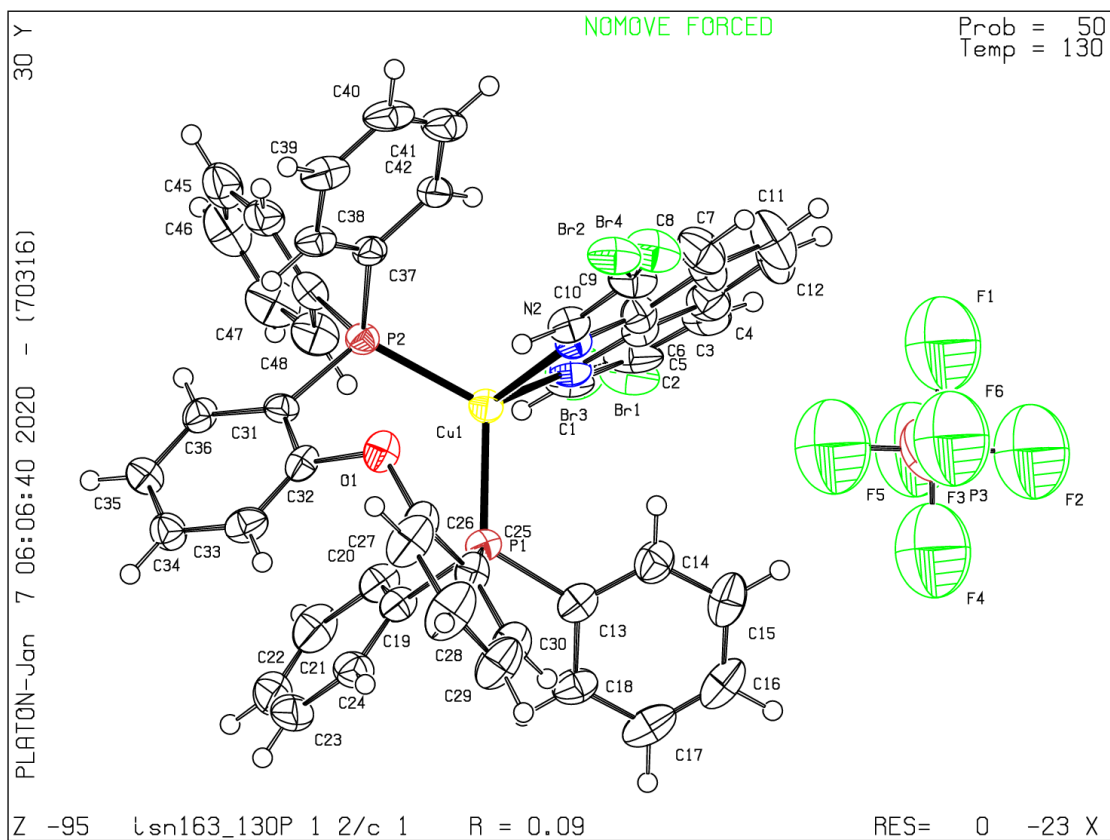

Supplement: s1 [file s1]
