# Supplementary material
Source: MDPI journal article supplement (https://www.mdpi.com/2304-6740/8/1/4)

# checkCIF/PLATON report

Structure factors have been supplied for datablock(s) isn166\_130k

THIS REPORT IS FOR GUIDANCE ONLY. IF USED AS PART OF A REVIEW PROCEDURE FOR PUBLICATION, IT SHOULD NOT REPLACE THE EXPERTISE OF AN EXPERIENCED CRYSTALLOGRAPHIC REFEREE.

No syntax errors found.      CIF dictionary      Interpreting this report

## Datablock: isn166\_130k

---

|                        |                                             |                                                      |
|------------------------|---------------------------------------------|------------------------------------------------------|
| Bond precision:        | C-C = 0.0098 Å                              | Wavelength=1.34143                                   |
| Cell:                  | a=33.3182(16)                               | b=14.1050(6)      c=11.8205(5)                       |
|                        | alpha=90                                    | beta=102.059(4)      gamma=90                        |
| Temperature:           | 130 K                                       |                                                      |
|                        | Calculated                                  | Reported                                             |
| Volume                 | 5432.5(4)                                   | 5432.5(4)                                            |
| Space group            | C 2/m                                       | C 1 2/m 1                                            |
| Hall group             | -C 2y                                       | -C 2y                                                |
| Moiety formula         | C51 H38 Br2 Cu N2 O P2, F6<br>P [+ solvent] | 0.5(C102 H76 Br4 Cu2 N4 O2<br>P4), F6 P, 1.1[CH2CL2] |
| Sum formula            | C51 H38 Br2 Cu F6 N2 O P3<br>[+ solvent]    | C52.10 H40.20 Br2 Cl2.20<br>Cu F6 N2 O P3            |
| Mr                     | 1125.09                                     | 1218.52                                              |
| Dx, g cm <sup>-3</sup> | 1.376                                       | 1.490                                                |
| Z                      | 4                                           | 4                                                    |
| Mu (mm <sup>-1</sup> ) | 4.173                                       | 4.895                                                |
| F000                   | 2256.0                                      | 2441.0                                               |
| F000'                  | 2244.77                                     |                                                      |
| h,k,lmax               | 41,17,14                                    | 41,17,14                                             |
| Nref                   | 5751                                        | 5607                                                 |
| Tmin,Tmax              | 0.441,0.822                                 | 0.005,0.909                                          |
| Tmin'                  | 0.256                                       |                                                      |

Correction method= # Reported T Limits: Tmin=0.005 Tmax=0.909  
AbsCorr = MULTI-SCAN

Data completeness= 0.975      Theta(max)= 56.714

R(reflections)= 0.0728( 4802)      wR2(reflections)= 0.1973( 5607)

S = 1.034      Npar= 417

---

The following ALERTS were generated. Each ALERT has the format

**test-name\_ALERT\_alert-type\_alert-level.**

Click on the hyperlinks for more details of the test.

## ● Alert level C

|                   |                                                  |                         |         |        |
|-------------------|--------------------------------------------------|-------------------------|---------|--------|
| PLAT220_ALERT_2_C | Non-Solvent Resd 1 C                             | Ueq(max)/Ueq(min) Range | 3.2     | Ratio  |
| PLAT241_ALERT_2_C | High 'MainMol' Ueq as Compared to Neighbors of   |                         | C10     | Check  |
| PLAT241_ALERT_2_C | High 'MainMol' Ueq as Compared to Neighbors of   |                         | C13     | Check  |
| PLAT260_ALERT_2_C | Large Average Ueq of Residue Including           | P3                      | 0.106   | Check  |
| PLAT329_ALERT_4_C | Carbon Atom Hybridisation Unclear for .....      |                         | C10     | Check  |
| PLAT332_ALERT_2_C | Large Phenyl C-C Range                           | C13 -C37                | 0.17    | Ang.   |
| PLAT341_ALERT_3_C | Low Bond Precision on C-C Bonds .....            |                         | 0.00985 | Ang.   |
| PLAT911_ALERT_3_C | Missing FCF Refl Between Thmin & STh/L=          | 0.600                   | 43      | Report |
| PLAT918_ALERT_3_C | Reflection(s) with I(obs) much Smaller I(calc) . |                         | 6       | Check  |
| PLAT977_ALERT_2_C | Check Negative Difference Density on H10         |                         | -0.34   | eA-3   |

## ● Alert level G

FORMU01\_ALERT\_2\_G There is a discrepancy between the atom counts in the  
 \_chemical\_formula\_sum and the formula from the \_atom\_site\* data.  
 Atom count from \_chemical\_formula\_sum: C52.1 H40.2 Br2 Cl2.2 Cu1 F6 N2  
 Atom count from the \_atom\_site data: C51 H38 Br2 Cu1 F6 N2 O1 P3

ABSMU01\_ALERT\_1\_G Calculation of \_exptl\_absorpt\_correction\_mu  
 not performed for this radiation type.

CELLZ01\_ALERT\_1\_G Difference between formula and atom\_site contents detected.

CELLZ01\_ALERT\_1\_G ALERT: Large difference may be due to a  
 symmetry error - see SYMMG tests

From the CIF: \_cell\_formula\_units\_Z 4

From the CIF: \_chemical\_formula\_sum C52.10 H40.20 Br2 Cl2.20 Cu F6 N2

TEST: Compare cell contents of formula and atom\_site data

| atom | Z*formula | cif sites | diff |
|------|-----------|-----------|------|
| C    | 208.40    | 204.00    | 4.40 |
| H    | 160.80    | 152.00    | 8.80 |
| Br   | 8.00      | 8.00      | 0.00 |
| Cl   | 8.80      | 0.00      | 8.80 |
| Cu   | 4.00      | 4.00      | 0.00 |
| F    | 24.00     | 24.00     | 0.00 |
| N    | 8.00      | 8.00      | 0.00 |
| O    | 4.00      | 4.00      | 0.00 |
| P    | 12.00     | 12.00     | 0.00 |

|                   |                                                  |       |              |
|-------------------|--------------------------------------------------|-------|--------------|
| PLAT002_ALERT_2_G | Number of Distance or Angle Restraints on AtSite | 17    | Note         |
| PLAT003_ALERT_2_G | Number of Uiso or Uij Restrained non-H Atoms ... | 19    | Report       |
| PLAT041_ALERT_1_G | Calc. and Reported SumFormula Strings Differ     |       | Please Check |
| PLAT042_ALERT_1_G | Calc. and Reported MoietyFormula Strings Differ  |       | Please Check |
| PLAT051_ALERT_1_G | Mu(calc) and Mu(CIF) Ratio Differs from 1.0 by . | 14.75 | %            |
| PLAT068_ALERT_1_G | Reported F000 Differs from Calcd (or Missing)... |       | Please Check |
| PLAT083_ALERT_2_G | SHELXL Second Parameter in WGHT Unusually Large  | 41.98 | Why ?        |
| PLAT171_ALERT_4_G | The CIF-Embedded .res File Contains EADP Records | 1     | Report       |
| PLAT174_ALERT_4_G | The CIF-Embedded .res File Contains FLAT Records | 2     | Report       |
| PLAT176_ALERT_4_G | The CIF-Embedded .res File Contains SADI Records | 3     | Report       |
| PLAT186_ALERT_4_G | The CIF-Embedded .res File Contains ISOR Records | 1     | Report       |
| PLAT187_ALERT_4_G | The CIF-Embedded .res File Contains RIGU Records | 3     | Report       |
| PLAT230_ALERT_2_G | Hirshfeld Test Diff for C13 --C32                | 5.1   | s.u.         |
| PLAT244_ALERT_4_G | Low 'Solvent' Ueq as Compared to Neighbors of    | P3    | Check        |
| PLAT300_ALERT_4_G | Atom Site Occupancy of O1 Constrained at         | 0.5   | Check        |
| PLAT300_ALERT_4_G | Atom Site Occupancy of C8 Constrained at         | 0.5   | Check        |
| PLAT300_ALERT_4_G | Atom Site Occupancy of C9 Constrained at         | 0.5   | Check        |
| PLAT300_ALERT_4_G | Atom Site Occupancy of Cl1 Constrained at        | 0.5   | Check        |
| PLAT300_ALERT_4_G | Atom Site Occupancy of Cl2 Constrained at        | 0.5   | Check        |

|                   |                                                  |                |           |       |
|-------------------|--------------------------------------------------|----------------|-----------|-------|
| PLAT300_ALERT_4_G | Atom Site Occupancy of C14                       | Constrained at | 0.5       | Check |
| PLAT300_ALERT_4_G | Atom Site Occupancy of C15                       | Constrained at | 0.5       | Check |
| PLAT300_ALERT_4_G | Atom Site Occupancy of C16                       | Constrained at | 0.5       | Check |
| PLAT300_ALERT_4_G | Atom Site Occupancy of C17                       | Constrained at | 0.5       | Check |
| PLAT300_ALERT_4_G | Atom Site Occupancy of C18                       | Constrained at | 0.5       | Check |
| PLAT300_ALERT_4_G | Atom Site Occupancy of C19                       | Constrained at | 0.5       | Check |
| PLAT300_ALERT_4_G | Atom Site Occupancy of C20                       | Constrained at | 0.5       | Check |
| PLAT300_ALERT_4_G | Atom Site Occupancy of C22                       | Constrained at | 0.5       | Check |
| PLAT300_ALERT_4_G | Atom Site Occupancy of C23                       | Constrained at | 0.5       | Check |
| PLAT300_ALERT_4_G | Atom Site Occupancy of C24                       | Constrained at | 0.5       | Check |
| PLAT300_ALERT_4_G | Atom Site Occupancy of C25                       | Constrained at | 0.5       | Check |
| PLAT300_ALERT_4_G | Atom Site Occupancy of C26                       | Constrained at | 0.5       | Check |
| PLAT300_ALERT_4_G | Atom Site Occupancy of C27                       | Constrained at | 0.5       | Check |
| PLAT300_ALERT_4_G | Atom Site Occupancy of C28                       | Constrained at | 0.5       | Check |
| PLAT300_ALERT_4_G | Atom Site Occupancy of C29                       | Constrained at | 0.5       | Check |
| PLAT300_ALERT_4_G | Atom Site Occupancy of C30                       | Constrained at | 0.5       | Check |
| PLAT300_ALERT_4_G | Atom Site Occupancy of C31                       | Constrained at | 0.5       | Check |
| PLAT300_ALERT_4_G | Atom Site Occupancy of C32                       | Constrained at | 0.5       | Check |
| PLAT300_ALERT_4_G | Atom Site Occupancy of C33                       | Constrained at | 0.5       | Check |
| PLAT300_ALERT_4_G | Atom Site Occupancy of C34                       | Constrained at | 0.5       | Check |
| PLAT300_ALERT_4_G | Atom Site Occupancy of C35                       | Constrained at | 0.5       | Check |
| PLAT300_ALERT_4_G | Atom Site Occupancy of C36                       | Constrained at | 0.5       | Check |
| PLAT300_ALERT_4_G | Atom Site Occupancy of C37                       | Constrained at | 0.5       | Check |
| PLAT300_ALERT_4_G | Atom Site Occupancy of H8                        | Constrained at | 0.5       | Check |
| PLAT300_ALERT_4_G | Atom Site Occupancy of H9                        | Constrained at | 0.5       | Check |
| PLAT300_ALERT_4_G | Atom Site Occupancy of H11                       | Constrained at | 0.5       | Check |
| PLAT300_ALERT_4_G | Atom Site Occupancy of H12                       | Constrained at | 0.5       | Check |
| PLAT300_ALERT_4_G | Atom Site Occupancy of H18                       | Constrained at | 0.5       | Check |
| PLAT300_ALERT_4_G | Atom Site Occupancy of H19                       | Constrained at | 0.5       | Check |
| PLAT300_ALERT_4_G | Atom Site Occupancy of H20                       | Constrained at | 0.5       | Check |
| PLAT300_ALERT_4_G | Atom Site Occupancy of H23                       | Constrained at | 0.5       | Check |
| PLAT300_ALERT_4_G | Atom Site Occupancy of H24                       | Constrained at | 0.5       | Check |
| PLAT300_ALERT_4_G | Atom Site Occupancy of H25                       | Constrained at | 0.5       | Check |
| PLAT300_ALERT_4_G | Atom Site Occupancy of H26                       | Constrained at | 0.5       | Check |
| PLAT300_ALERT_4_G | Atom Site Occupancy of H27                       | Constrained at | 0.5       | Check |
| PLAT300_ALERT_4_G | Atom Site Occupancy of H28A                      | Constrained at | 0.5       | Check |
| PLAT300_ALERT_4_G | Atom Site Occupancy of H28B                      | Constrained at | 0.5       | Check |
| PLAT300_ALERT_4_G | Atom Site Occupancy of H28C                      | Constrained at | 0.5       | Check |
| PLAT300_ALERT_4_G | Atom Site Occupancy of H29A                      | Constrained at | 0.5       | Check |
| PLAT300_ALERT_4_G | Atom Site Occupancy of H29B                      | Constrained at | 0.5       | Check |
| PLAT300_ALERT_4_G | Atom Site Occupancy of H29C                      | Constrained at | 0.5       | Check |
| PLAT300_ALERT_4_G | Atom Site Occupancy of H30                       | Constrained at | 0.5       | Check |
| PLAT300_ALERT_4_G | Atom Site Occupancy of H31                       | Constrained at | 0.5       | Check |
| PLAT300_ALERT_4_G | Atom Site Occupancy of H32                       | Constrained at | 0.5       | Check |
| PLAT300_ALERT_4_G | Atom Site Occupancy of H34                       | Constrained at | 0.5       | Check |
| PLAT300_ALERT_4_G | Atom Site Occupancy of H35                       | Constrained at | 0.5       | Check |
| PLAT300_ALERT_4_G | Atom Site Occupancy of H36                       | Constrained at | 0.5       | Check |
| PLAT300_ALERT_4_G | Atom Site Occupancy of H37                       | Constrained at | 0.5       | Check |
| PLAT301_ALERT_3_G | Main Residue Disorder .....(Resd 1 )             |                | 47%       | Note  |
| PLAT410_ALERT_2_G | Short Intra H...H Contact H9 ..H10 .             |                | 2.07 Ang. |       |
|                   | x,y,z =                                          | 1_555          | Check     |       |
| PLAT605_ALERT_4_G | Largest Solvent Accessible VOID in the Structure |                | 441       | A**3  |
| PLAT773_ALERT_2_G | Check long C-C Bond in CIF: C8 --C9              |                | 1.96 Ang. |       |
| PLAT773_ALERT_2_G | Check long C-C Bond in CIF: C9 --C8              |                | 1.96 Ang. |       |
| PLAT773_ALERT_2_G | Check long C-C Bond in CIF: C33 --C33            |                | 2.02 Ang. |       |
| PLAT779_ALERT_4_G | Suspect or Irrelevant (Bond) Angle(s) in CIF . # |                | 136       | Check |
|                   | C8 -C8 -C9 6.565 1.555 6.565                     | 43.90          | Deg.      |       |
| PLAT779_ALERT_4_G | Suspect or Irrelevant (Bond) Angle(s) in CIF . # |                | 140       | Check |
|                   | C9 -C8 -C9 1.555 1.555 6.565                     | 39.60          | Deg.      |       |
| PLAT779_ALERT_4_G | Suspect or Irrelevant (Bond) Angle(s) in CIF . # |                | 151       | Check |
|                   | C9 -C9 -C8 6.565 1.555 6.565                     | 43.90          | Deg.      |       |
| PLAT779_ALERT_4_G | Suspect or Irrelevant (Bond) Angle(s) in CIF . # |                | 165       | Check |

|     |      |      |       |       |       |            |
|-----|------|------|-------|-------|-------|------------|
| C33 | -C33 | -H33 | 6.565 | 1.555 | 1.555 | 15.10 Deg. |
|-----|------|------|-------|-------|-------|------------|

```

PLAT811_ALERT_5_G No ADDSYM Analysis: Too Many Excluded Atoms .... ! Info
PLAT860_ALERT_3_G Number of Least-Squares Restraints ..... 156 Note
PLAT868_ALERT_4_G ALERTS Due to the Use of _smtbx_masks Suppressed ! Info
PLAT910_ALERT_3_G Missing # of FCF Reflection(s) Below Theta(Min). 2 Note
PLAT912_ALERT_4_G Missing # of FCF Reflections Above STh/L= 0.600 99 Note
PLAT933_ALERT_2_G Number of OMIT Records in Embedded .res File ... 2 Note
PLAT978_ALERT_2_G Number C-C Bonds with Positive Residual Density. 1 Info
PLAT984_ALERT_1_G The C-f' = 0.0148 Deviates from the B&C-Value 0.0137 Check
PLAT984_ALERT_1_G The Br-f' = -0.9501 Deviates from the B&C-Value -0.9338 Check
PLAT984_ALERT_1_G The Cu-f' = -2.9183 Deviates from the B&C-Value -2.7974 Check
PLAT984_ALERT_1_G The F-f' = 0.0600 Deviates from the B&C-Value 0.0583 Check
PLAT984_ALERT_1_G The N-f' = 0.0253 Deviates from the B&C-Value 0.0241 Check
PLAT984_ALERT_1_G The O-f' = 0.0412 Deviates from the B&C-Value 0.0389 Check
PLAT984_ALERT_1_G The P-f' = 0.2596 Deviates from the B&C-Value 0.2543 Check
PLAT985_ALERT_1_G The Br-f" = 1.0411 Deviates from the B&C-Value 1.0006 Check
PLAT985_ALERT_1_G The Cu-f" = 3.6937 Deviates from the B&C-Value 3.6876 Check
PLAT985_ALERT_1_G The F-f" = 0.0411 Deviates from the B&C-Value 0.0400 Check
PLAT985_ALERT_1_G The P-f" = 0.3354 Deviates from the B&C-Value 0.3332 Check

```

---

```

0 ALERT level A = Most likely a serious problem - resolve or explain
0 ALERT level B = A potentially serious problem, consider carefully
10 ALERT level C = Check. Ensure it is not caused by an omission or oversight
99 ALERT level G = General information/check it is not something unexpected

```

```

18 ALERT type 1 CIF construction/syntax error, inconsistent or missing data
17 ALERT type 2 Indicator that the structure model may be wrong or deficient
6 ALERT type 3 Indicator that the structure quality may be low
67 ALERT type 4 Improvement, methodology, query or suggestion
1 ALERT type 5 Informative message, check

```

---

## Validation response form

Please find below a validation response form (VRF) that can be filled in and pasted into your CIF.

```

# start Validation Reply Form
_vrf_PLAT220_isn166_130k
;
PROBLEM: Non-Solvent Resd 1 C Ueq(max)/Ueq(min) Range 3.2 Ratio
RESPONSE: ...
;
_vrf_PLAT241_isn166_130k
;
PROBLEM: High 'MainMol' Ueq as Compared to Neighbors of C10 Check
RESPONSE: ...
;
_vrf_PLAT260_isn166_130k
;
PROBLEM: Large Average Ueq of Residue Including P3 0.106 Check
RESPONSE: ...
;
_vrf_PLAT329_isn166_130k
;
PROBLEM: Carbon Atom Hybridisation Unclear for ..... C10 Check
RESPONSE: ...
;
_vrf_PLAT332_isn166_130k
;
PROBLEM: Large Phenyl C-C Range C13 -C37 . 0.17 Ang.

```

```

RESPONSE: ...
;
_vrf_PLAT341_isn166_130k
;
PROBLEM: Low Bond Precision on C-C Bonds ..... 0.00985 Ang.
RESPONSE: ...
;
_vrf_PLAT911_isn166_130k
;
PROBLEM: Missing FCF Refl Between Thmin & STh/L= 0.600 43 Report
RESPONSE: ...
;
_vrf_PLAT918_isn166_130k
;
PROBLEM: Reflection(s) with I(obs) much Smaller I(calc) . 6 Check
RESPONSE: ...
;
_vrf_PLAT977_isn166_130k
;
PROBLEM: Check Negative Difference Density on H10 -0.34 eA-3
RESPONSE: ...
;
# end Validation Reply Form

```

---

It is advisable to attempt to resolve as many as possible of the alerts in all categories. Often the minor alerts point to easily fixed oversights, errors and omissions in your CIF or refinement strategy, so attention to these fine details can be worthwhile. In order to resolve some of the more serious problems it may be necessary to carry out additional measurements or structure refinements. However, the purpose of your study may justify the reported deviations and the more serious of these should normally be commented upon in the discussion or experimental section of a paper or in the "special\_details" fields of the CIF. checkCIF was carefully designed to identify outliers and unusual parameters, but every test has its limitations and alerts that are not important in a particular case may appear. Conversely, the absence of alerts does not guarantee there are no aspects of the results needing attention. It is up to the individual to critically assess their own results and, if necessary, seek expert advice.

### **Publication of your CIF in IUCr journals**

A basic structural check has been run on your CIF. These basic checks will be run on all CIFs submitted for publication in IUCr journals (*Acta Crystallographica*, *Journal of Applied Crystallography*, *Journal of Synchrotron Radiation*); however, if you intend to submit to *Acta Crystallographica Section C* or *E* or *IUCrData*, you should make sure that full publication checks are run on the final version of your CIF prior to submission.

### **Publication of your CIF in other journals**

Please refer to the *Notes for Authors* of the relevant journal for any special instructions relating to CIF submission.

---

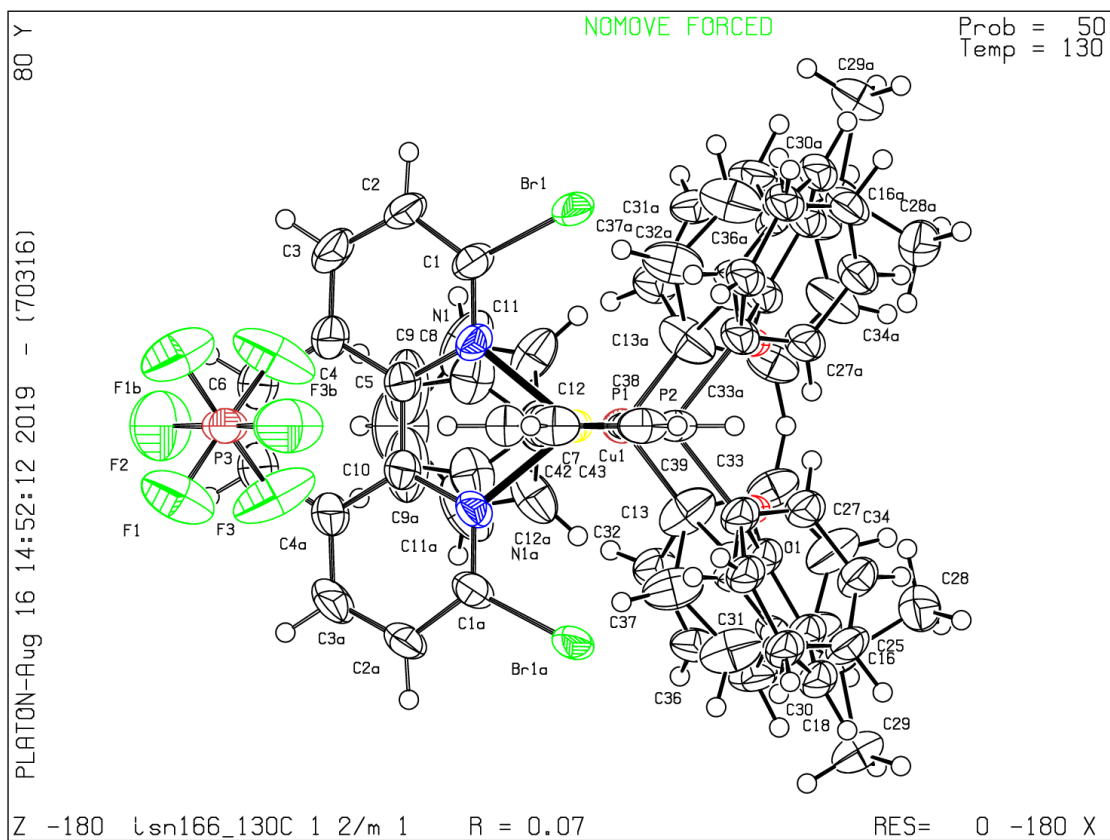

Supplement: s1 [file s1]
