# Supplementary material
Source: MDPI journal article supplement (https://www.mdpi.com/2304-6740/8/1/4)

# checkCIF/PLATON report

You have not supplied any structure factors. As a result the full set of tests cannot be run.

THIS REPORT IS FOR GUIDANCE ONLY. IF USED AS PART OF A REVIEW PROCEDURE FOR PUBLICATION, IT SHOULD NOT REPLACE THE EXPERTISE OF AN EXPERIENCED CRYSTALLOGRAPHIC REFEREE.

No syntax errors found.      CIF dictionary      Interpreting this report

## Datablock: isn164\_130k\_0m

---

Bond precision:    C-C = 0.0038 Å

Wavelength=1.54178

Cell:                    a=12.4032(9)                    b=18.9805(14)                    c=22.0591(17)  
                          alpha=70.330(3)                    beta=77.791(3)                    gamma=87.292(3)  
Temperature:    130 K

|                        | Calculated                                  | Reported                                   |
|------------------------|---------------------------------------------|--------------------------------------------|
| Volume                 | 4777.9(6)                                   | 4777.9(6)                                  |
| Space group            | P -1                                        | P -1                                       |
| Hall group             | -P 1                                        | -P 1                                       |
| Moiety formula         | C48 H34 Br2 Cu N2 O P2, F6<br>P [+ solvent] | C48 H34 Br2 Cu N2 O P2, F6<br>P, 1[CH2CL2] |
| Sum formula            | C48 H34 Br2 Cu F6 N2 O P3<br>[+ solvent]    | C49 H36 Br2 Cl2 Cu F6 N2 O<br>P3           |
| Mr                     | 1085.03                                     | 1169.97                                    |
| Dx, g cm <sup>-3</sup> | 1.508                                       | 1.626                                      |
| Z                      | 4                                           | 4                                          |
| Mu (mm <sup>-1</sup> ) | 4.076                                       | 5.128                                      |
| F000                   | 2168.0                                      | 2336.0                                     |
| F000'                  | 2163.70                                     |                                            |
| h,k,lmax               | 15,23,26                                    | 14,23,26                                   |
| Nref                   | 18239                                       | 17481                                      |
| Tmin,Tmax              | 0.457,0.599                                 | 0.671,0.753                                |
| Tmin'                  | 0.312                                       |                                            |

Correction method= # Reported T Limits: Tmin=0.671 Tmax=0.753  
AbsCorr = MULTI-SCAN

Data completeness= 0.958

Theta(max)= 70.417

R(reflections)= 0.0327( 16297)

wR2(reflections)= 0.0834( 17481)

S = 1.008

Npar= 1135

---

The following ALERTS were generated. Each ALERT has the format

**test-name\_ALERT\_alert-type\_alert-level.**

Click on the hyperlinks for more details of the test.

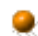

#### Alert level B

PLAT201\_ALERT\_2\_B Isotropic non-H Atoms in Main Residue(s) ..... 1 Report  
01

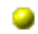

#### Alert level C

PLAT230\_ALERT\_2\_C Hirshfeld Test Diff for O2 --C79 . 6.6 s.u.  
PLAT250\_ALERT\_2\_C Large U3/U1 Ratio for Average U(i,j) Tensor .... 3.0 Note  
PLAT250\_ALERT\_2\_C Large U3/U1 Ratio for Average U(i,j) Tensor .... 2.5 Note

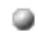

#### Alert level G

FORMU01\_ALERT\_2\_G There is a discrepancy between the atom counts in the  
\_chemical\_formula\_sum and the formula from the \_atom\_site\* data.  
Atom count from \_chemical\_formula\_sum: C49 H36 Br2 Cl2 Cu1 F6 N2 O1 P3  
Atom count from the \_atom\_site data: C48 H34 Br2 Cu1 F6 N2 O1 P3  
CELLZ01\_ALERT\_1\_G Difference between formula and atom\_site contents detected.  
CELLZ01\_ALERT\_1\_G ALERT: Large difference may be due to a  
symmetry error - see SYMMG tests  
From the CIF: \_cell\_formula\_units\_Z 4  
From the CIF: \_chemical\_formula\_sum C49 H36 Br2 Cl2 Cu F6 N2 O P3  
TEST: Compare cell contents of formula and atom\_site data

| atom | Z*formula | cif sites | diff |
|------|-----------|-----------|------|
| C    | 196.00    | 192.00    | 4.00 |
| H    | 144.00    | 136.00    | 8.00 |
| Br   | 8.00      | 8.00      | 0.00 |
| Cl   | 8.00      | 0.00      | 8.00 |
| Cu   | 4.00      | 4.00      | 0.00 |
| F    | 24.00     | 24.00     | 0.00 |
| N    | 8.00      | 8.00      | 0.00 |
| O    | 4.00      | 4.00      | 0.00 |
| P    | 12.00     | 12.00     | 0.00 |

PLAT012\_ALERT\_1\_G N.O.K. \_shelx\_res\_checksum Found in CIF ..... Please Check  
PLAT041\_ALERT\_1\_G Calc. and Reported SumFormula Strings Differ Please Check  
PLAT051\_ALERT\_1\_G Mu(calc) and Mu(CIF) Ratio Differs from 1.0 by . 20.52 %  
PLAT068\_ALERT\_1\_G Reported F000 Differs from Calcd (or Missing)... Please Check  
PLAT083\_ALERT\_2\_G SHELXL Second Parameter in WGHT Unusually Large 6.23 Why ?  
PLAT154\_ALERT\_1\_G The s.u.'s on the Cell Angles are Equal ..(Note) 0.003 Degree  
PLAT232\_ALERT\_2\_G Hirshfeld Test Diff (M-X) Cu1 --P1 . 5.3 s.u.  
PLAT232\_ALERT\_2\_G Hirshfeld Test Diff (M-X) Cu2 --P4 . 5.7 s.u.  
PLAT244\_ALERT\_4\_G Low Solvent Ueq as Compared to Neighbors of P5 Check  
PLAT244\_ALERT\_4\_G Low Solvent Ueq as Compared to Neighbors of P6 Check  
PLAT606\_ALERT\_4\_G VERY LARGE Solvent Accessible VOID(S) in Structure ! Info  
PLAT802\_ALERT\_4\_G CIF Input Record(s) with more than 80 Characters 1 Info  
PLAT868\_ALERT\_4\_G ALERTS Due to the Use of \_smtbx\_masks Suppressed ! Info  
PLAT933\_ALERT\_2\_G Number of OMIT Records in Embedded .res File ... 9 Note

- 0 **ALERT level A** = Most likely a serious problem - resolve or explain  
1 **ALERT level B** = A potentially serious problem, consider carefully  
3 **ALERT level C** = Check. Ensure it is not caused by an omission or oversight  
17 **ALERT level G** = General information/check it is not something unexpected

7 ALERT type 1 CIF construction/syntax error, inconsistent or missing data

9 ALERT type 2 Indicator that the structure model may be wrong or deficient  
0 ALERT type 3 Indicator that the structure quality may be low  
5 ALERT type 4 Improvement, methodology, query or suggestion  
0 ALERT type 5 Informative message, check

---

It is advisable to attempt to resolve as many as possible of the alerts in all categories. Often the minor alerts point to easily fixed oversights, errors and omissions in your CIF or refinement strategy, so attention to these fine details can be worthwhile. In order to resolve some of the more serious problems it may be necessary to carry out additional measurements or structure refinements. However, the purpose of your study may justify the reported deviations and the more serious of these should normally be commented upon in the discussion or experimental section of a paper or in the "special\_details" fields of the CIF. checkCIF was carefully designed to identify outliers and unusual parameters, but every test has its limitations and alerts that are not important in a particular case may appear. Conversely, the absence of alerts does not guarantee there are no aspects of the results needing attention. It is up to the individual to critically assess their own results and, if necessary, seek expert advice.

### **Publication of your CIF in IUCr journals**

A basic structural check has been run on your CIF. These basic checks will be run on all CIFs submitted for publication in IUCr journals (*Acta Crystallographica*, *Journal of Applied Crystallography*, *Journal of Synchrotron Radiation*); however, if you intend to submit to *Acta Crystallographica Section C* or *E* or *IUCrData*, you should make sure that full publication checks are run on the final version of your CIF prior to submission.

### **Publication of your CIF in other journals**

Please refer to the *Notes for Authors* of the relevant journal for any special instructions relating to CIF submission.

---

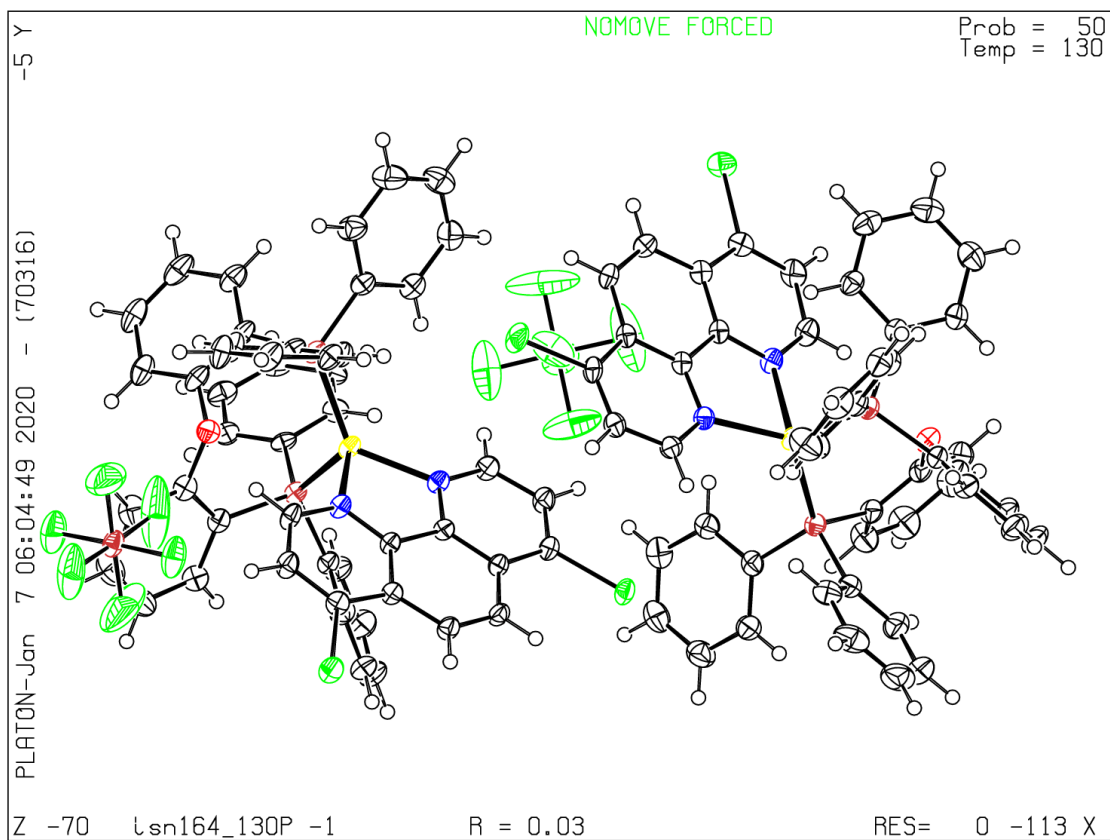

Supplement: s1 [file s1]
