# Supplementary material
Source: MDPI journal article supplement (https://www.mdpi.com/2304-6740/8/1/4)
Supplement: s1 [file s1]

# Supplementary Materials: Heteroleptic [Cu(P<sup>^</sup>P)(N<sup>^</sup>N)][PF<sub>6</sub>] Compounds with Isomeric Dibromo-1,10-Phenanthroline Ligands

Isaak Nohara, Aramis Keller, Nikolai Tarassenko, Alessandro Prescimone, Edwin C. Constable, and Catherine E. Housecroft \*

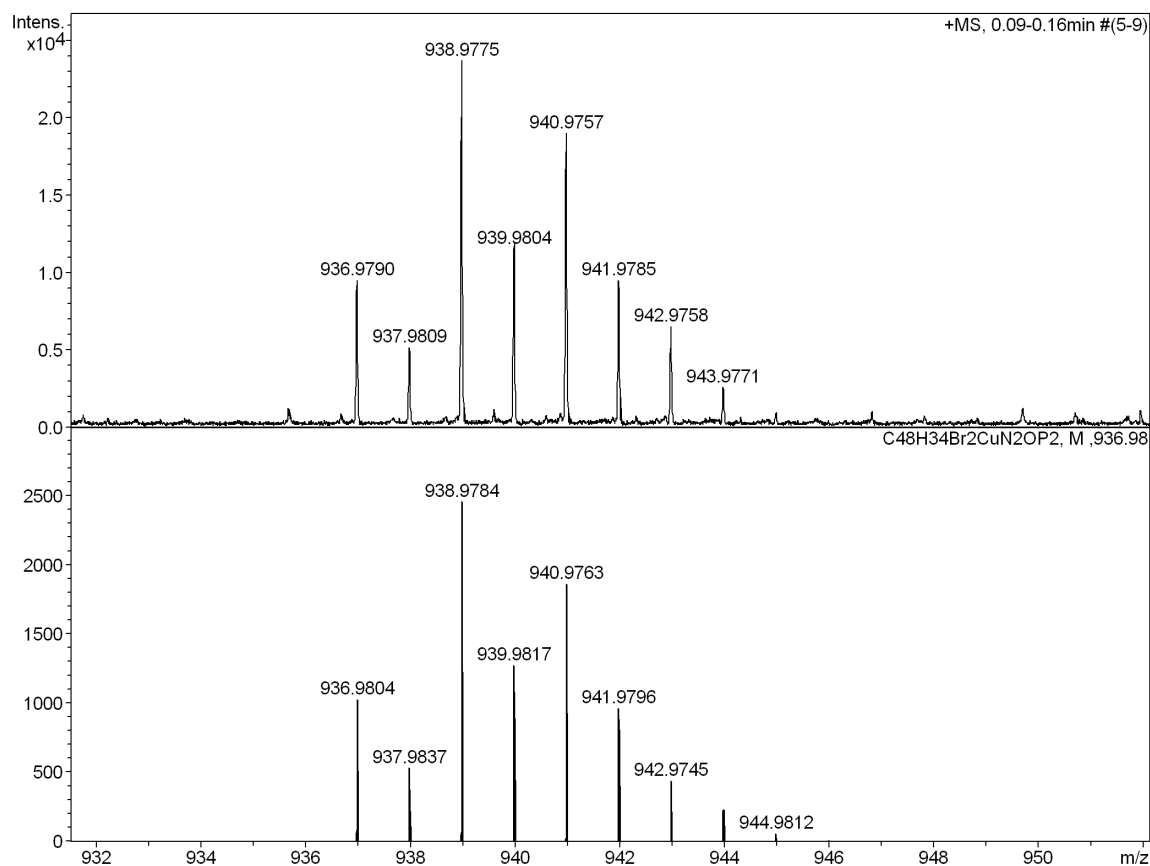

Fig. S1. The [M-PF<sub>6</sub>]<sup>+</sup> peak in the high-resolution electrospray mass spectrum of [Cu(POP)(2,9-Br<sub>2</sub>phen)][PF<sub>6</sub>]: top, observed and bottom, calculated.

Line#:1 R.Time:----(Scan# :----) MS Spectrum Positive Full Scan Zoomed View  
 MassPeaks:20  
 Spectrum Mode:Averaged 0.007-0.180(3-55) Base Peak:601.09(572243)  
 BG Mode:Averaged 0.247-2.993(75-899) Segment 1 - Event 1

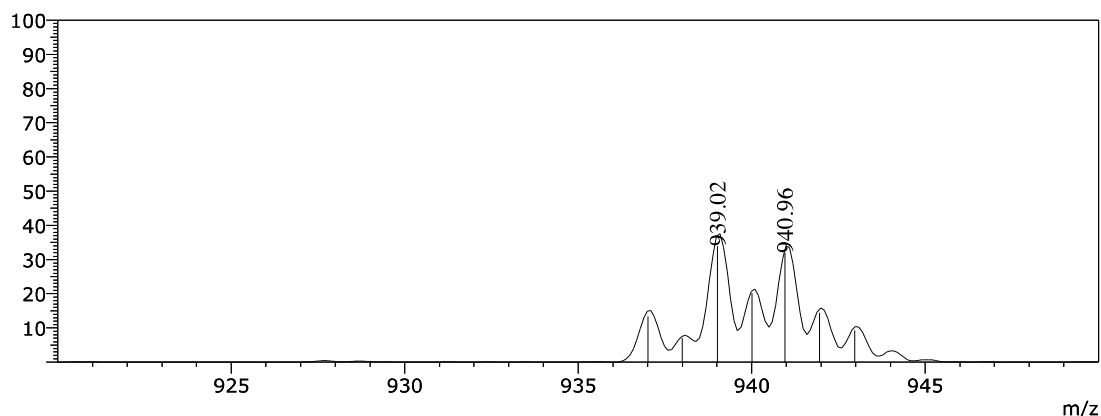

Line#:1 R.Time:----(Scan# :----) MS Spectrum Positive Full Scan Zoomed View  
 MassPeaks:20  
 Spectrum Mode:Averaged 0.007-0.180(3-55) Base Peak:601.09(572243)  
 BG Mode:Averaged 0.247-2.993(75-899) Segment 1 - Event 1

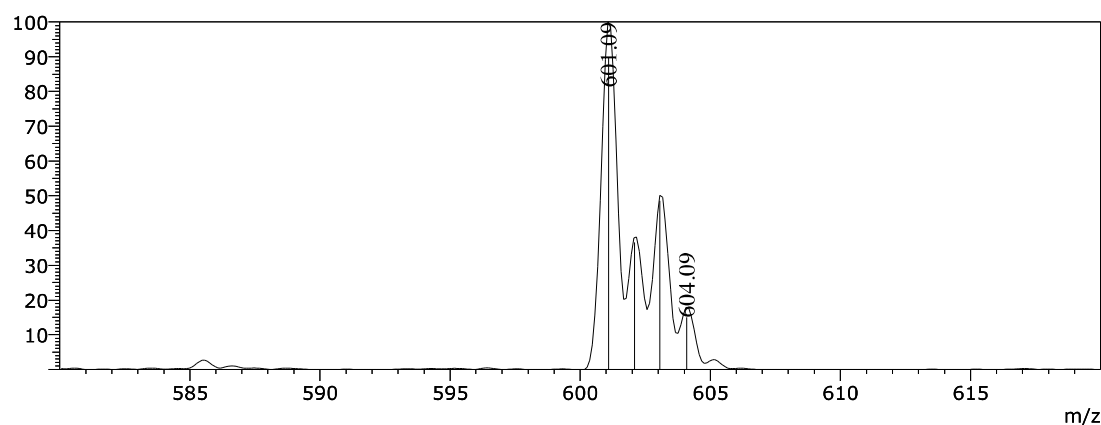

Fig. S2. Expansions of the peaks for the  $[M-PF_6]^+$  and  $[Cu(POP)]^+$  ions in the ESI mass spectrum of  $[Cu(POP)(2,9-Br_2phen)][PF_6]$ .

Line#:1 R.Time:0.067(Scan#:9) MS Spectrum Positive Full Scan Zoomed View  
 MassPeaks:15  
 Spectrum Mode:Single 0.067(9) Base Peak:701.47(2224000)  
 BG Mode:None Segment 1 - Event 1

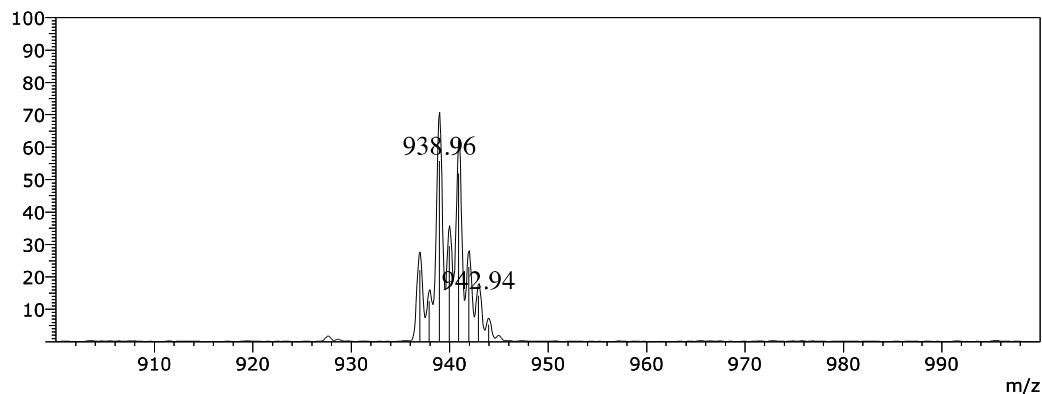

Fig. S3. Expansion of the peak for the  $[M-PF_6]^+$  ion in the ESI mass spectrum of  $[Cu(POP)(3,8-Br_2phen)][PF_6]$ .

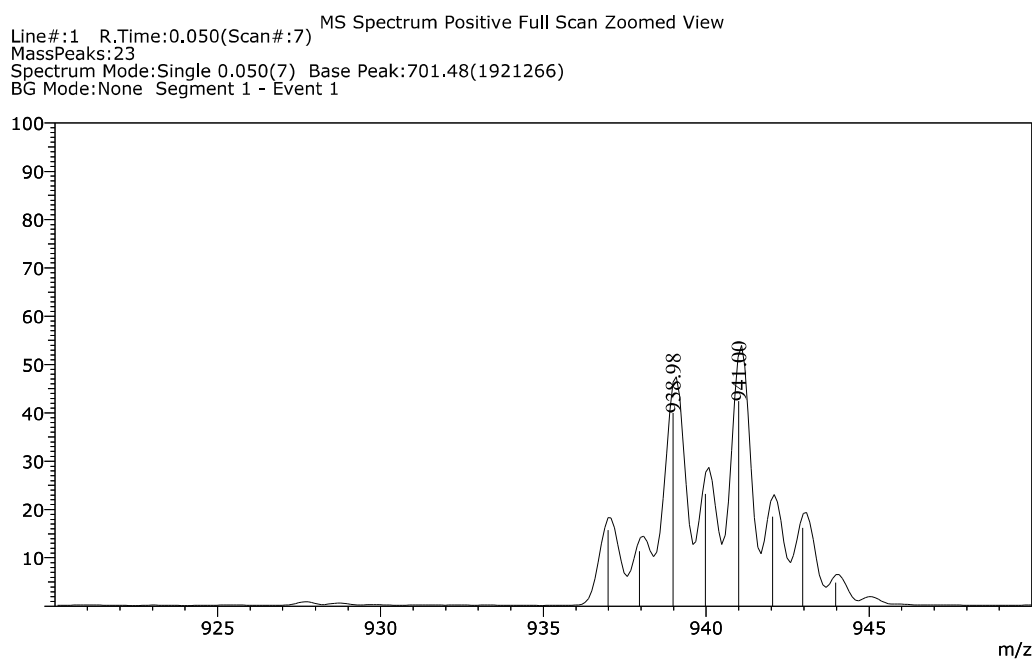

Fig. S4. Expansion of the peak for the  $[M-PF_6]^+$  ion in the ESI mass spectrum of  $[Cu(POP)(4,7-Br_2phen)][PF_6]$ .

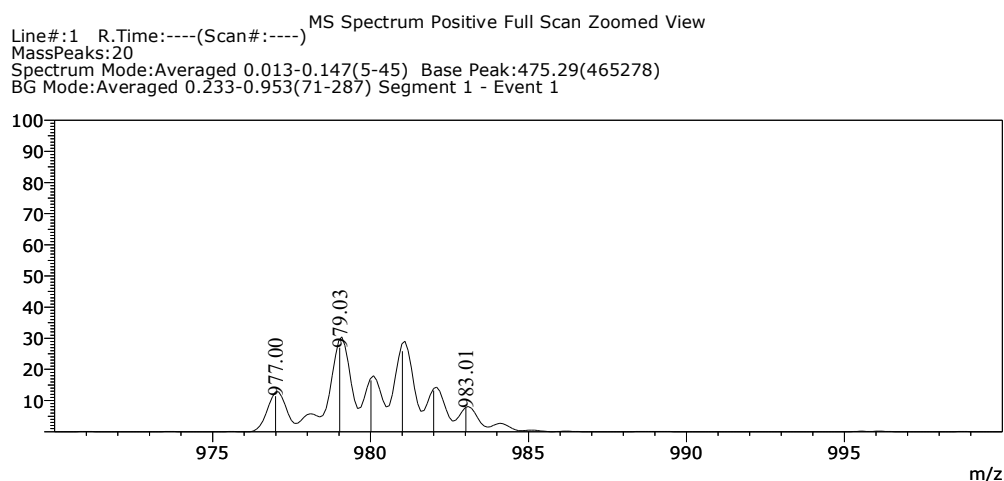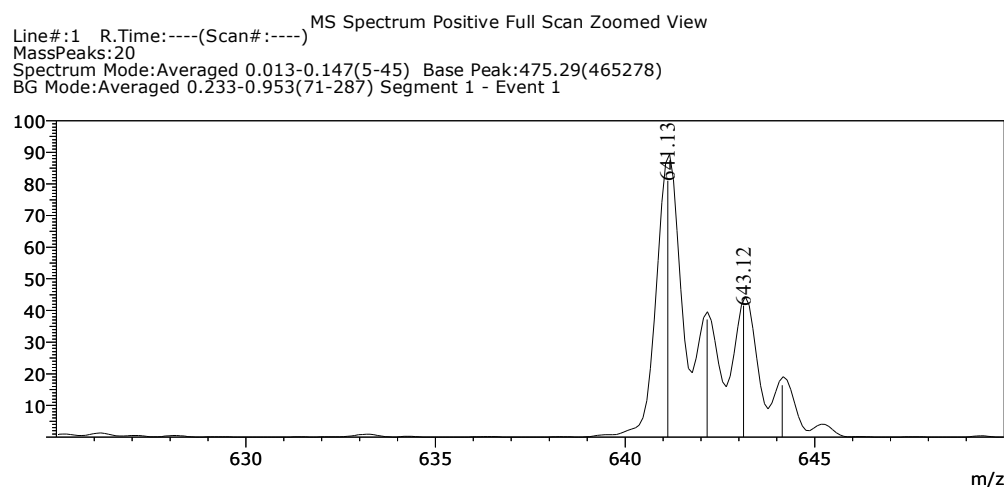

Fig. S5. Expansions of the peaks for the  $[M-PF_6]^+$  and  $[Cu(xantphos)]^+$  ions in the ESI mass spectrum of  $[Cu(xantphos)(2,9-Br_2phen)][PF_6]$ .

Line#:1 R.Time:0.067(Scan#:9) MS Spectrum Positive Full Scan Zoomed View  
 MassPeaks:31  
 Spectrum Mode:Single 0.067(9) Base Peak:528.49(1650476)  
 BG Mode:None Segment 1 - Event 1

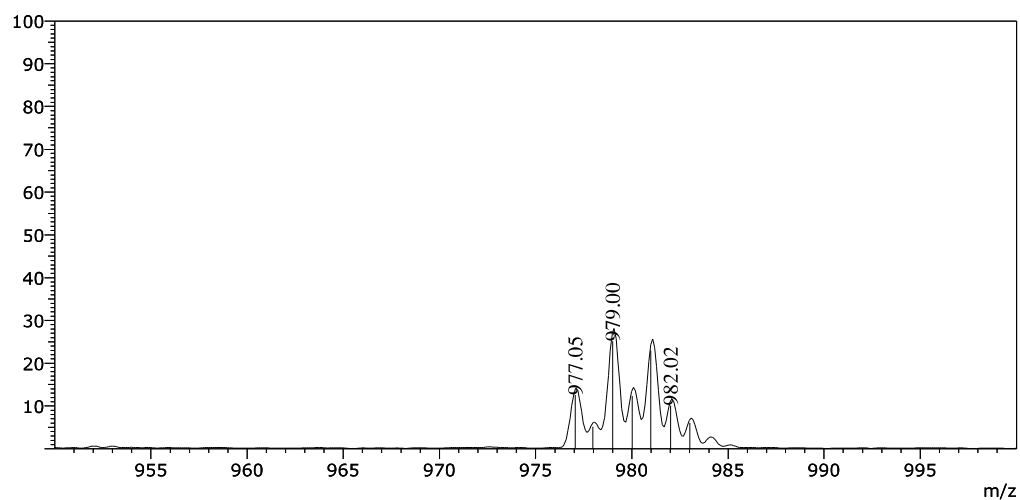

Fig. S6. Expansion of the peak for the  $[M-PF_6]^+$  ion in the ESI mass spectrum of  $[Cu(xantphos)(3,8-Br_2phen)][PF_6]$ .

Line#:1 R.Time:-----(Scan#:----) MS Spectrum Positive Full Scan Zoomed View  
 MassPeaks:20  
 Spectrum Mode:Averaged 0.013-0.113(5-35) Base Peak:475.30(810959)  
 BG Mode:Averaged 0.507-1.387(153-417) Segment 1 - Event 1

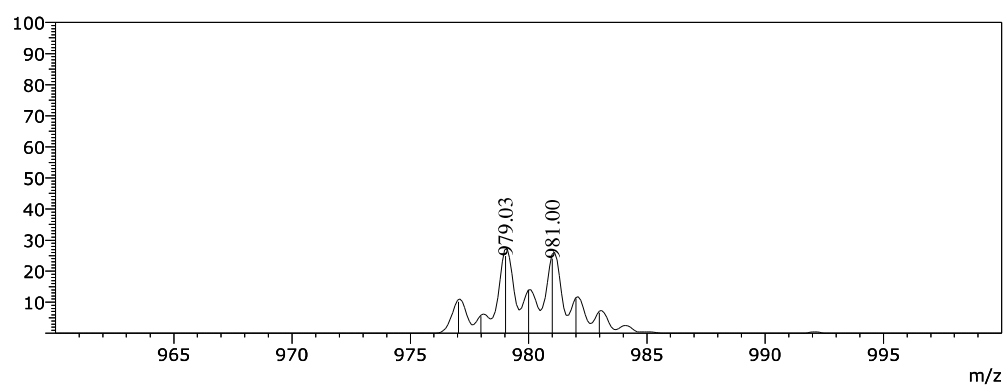

Fig. S7. Expansion of the peak for the  $[M-PF_6]^+$  ion in the ESI mass spectrum of  $[Cu(xantphos)(4,7-Br_2phen)][PF_6]$ .

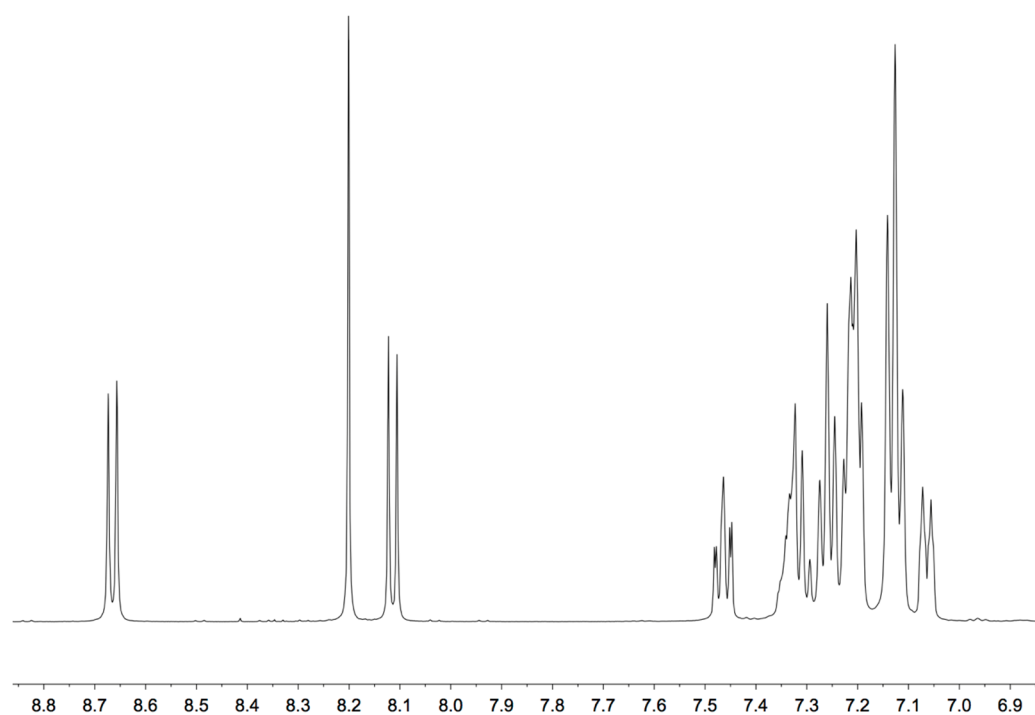

Fig. S8. Aromatic region of the  $^1\text{H}$  NMR spectrum (500 MHz, acetone- $d_6$ , 298 K) of  $[\text{Cu}(\text{POP})(2,9\text{-Br}_2\text{phen})][\text{PF}_6]$ .

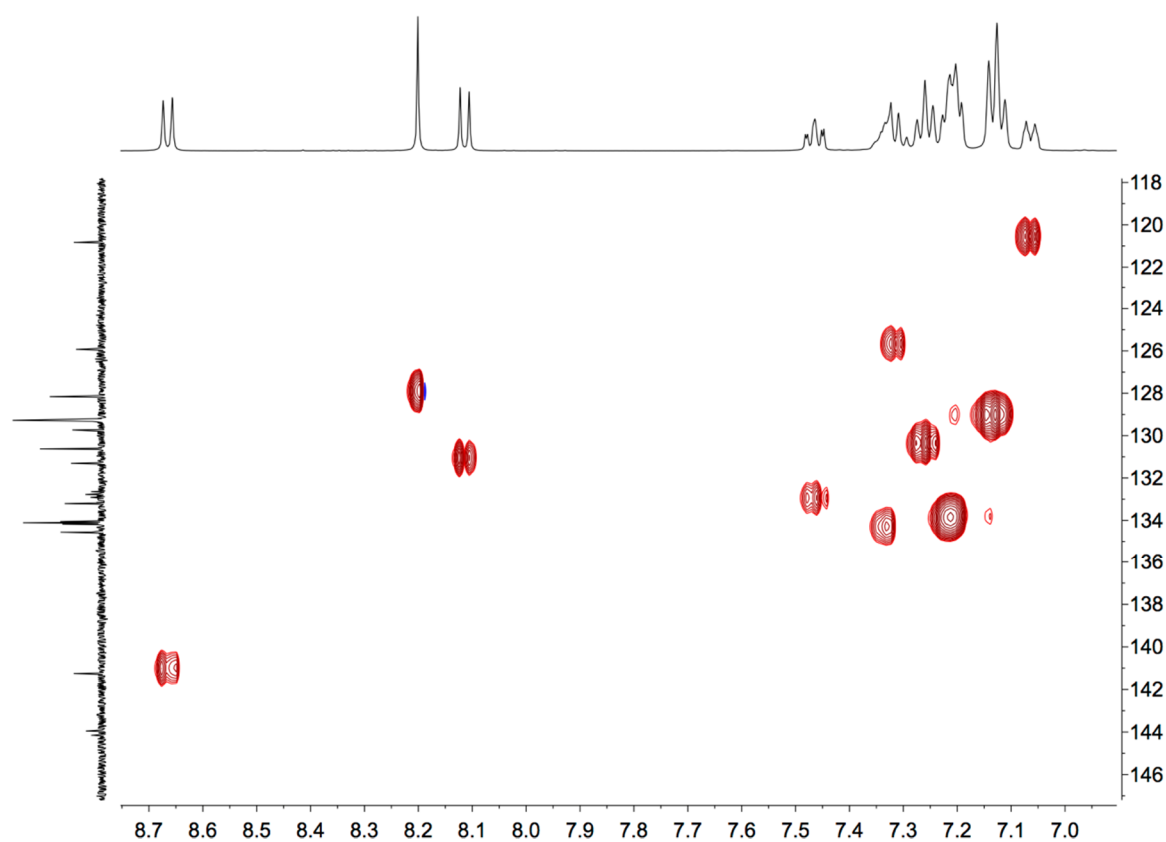

Fig. S9. HMQC spectrum (500 MHz  $^1\text{H}$ , 126 MHz  $^{13}\text{C}\{^1\text{H}\}$ , acetone- $d_6$ , 298 K) of  $[\text{Cu}(\text{POP})(2,9\text{-Br}_2\text{phen})][\text{PF}_6]$ .

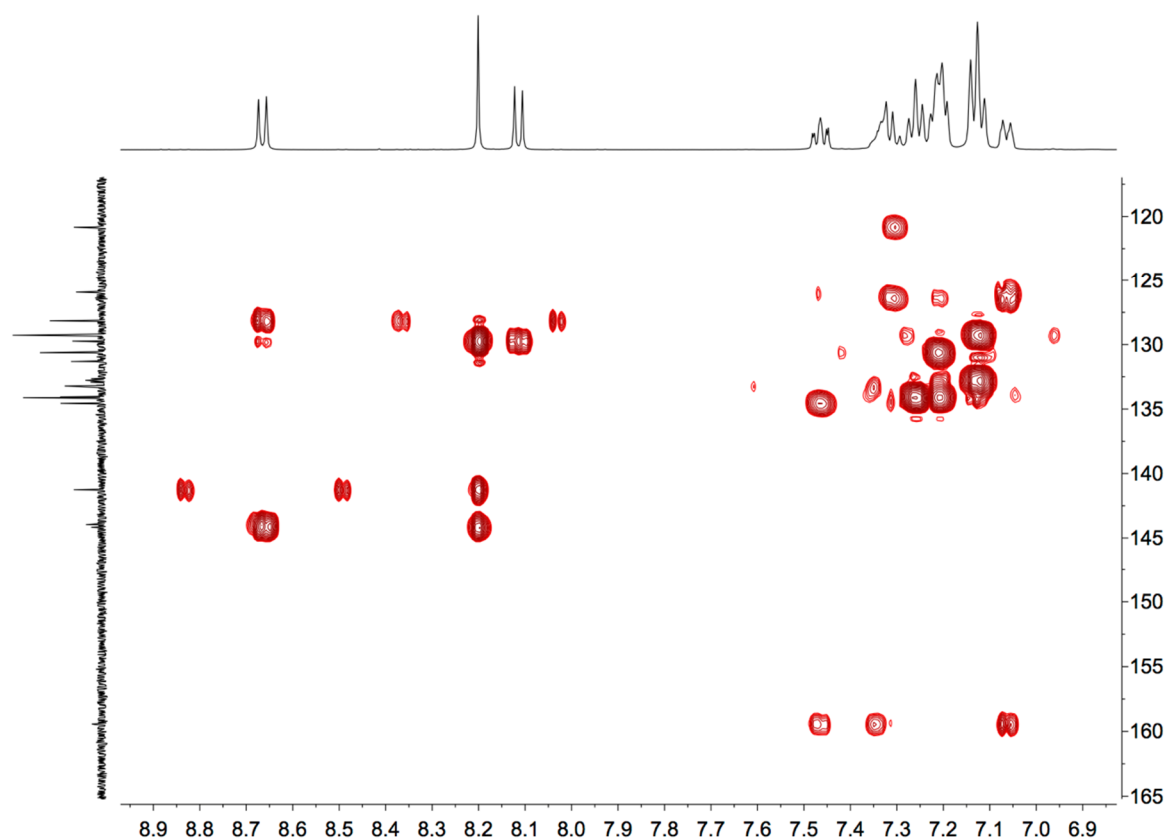

Fig. S10. HMBC spectrum (500 MHz  $^1\text{H}$ , 126 MHz  $^{13}\text{C}\{^1\text{H}\}$ ,  $\text{acetone-}d_6$ , 298 K) of  $[\text{Cu}(\text{POP})(2,9\text{-Br}_2\text{phen})][\text{PF}_6]$ .

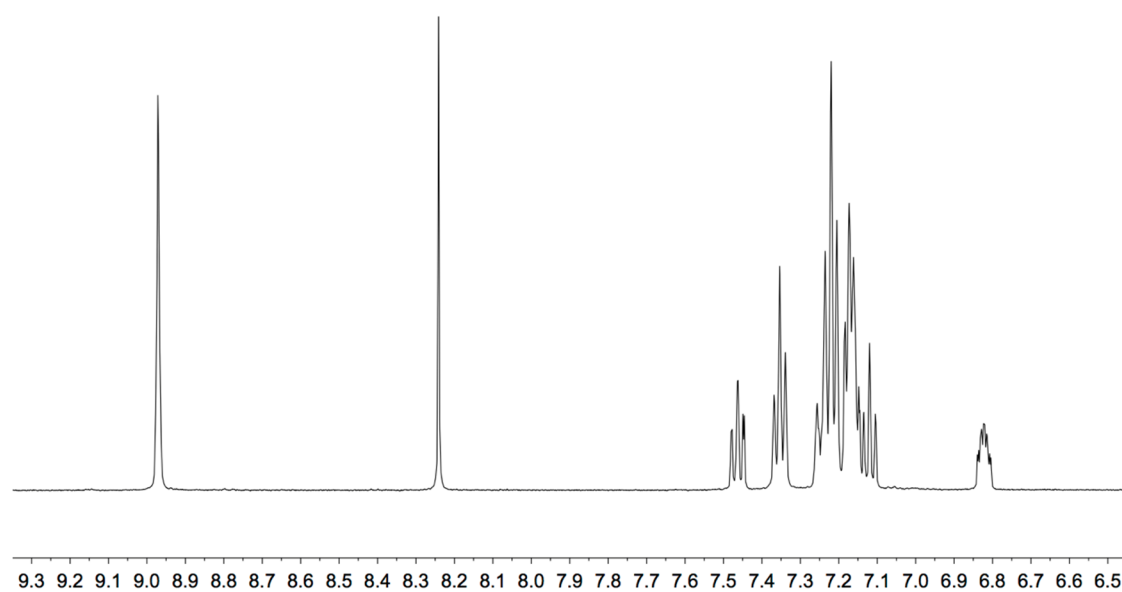

Fig. S11. Aromatic region of the  $^1\text{H}$  NMR spectrum (500 MHz,  $\text{acetone-}d_6$ , 298 K) of  $[\text{Cu}(\text{POP})(3,8\text{-Br}_2\text{phen})][\text{PF}_6]$ .

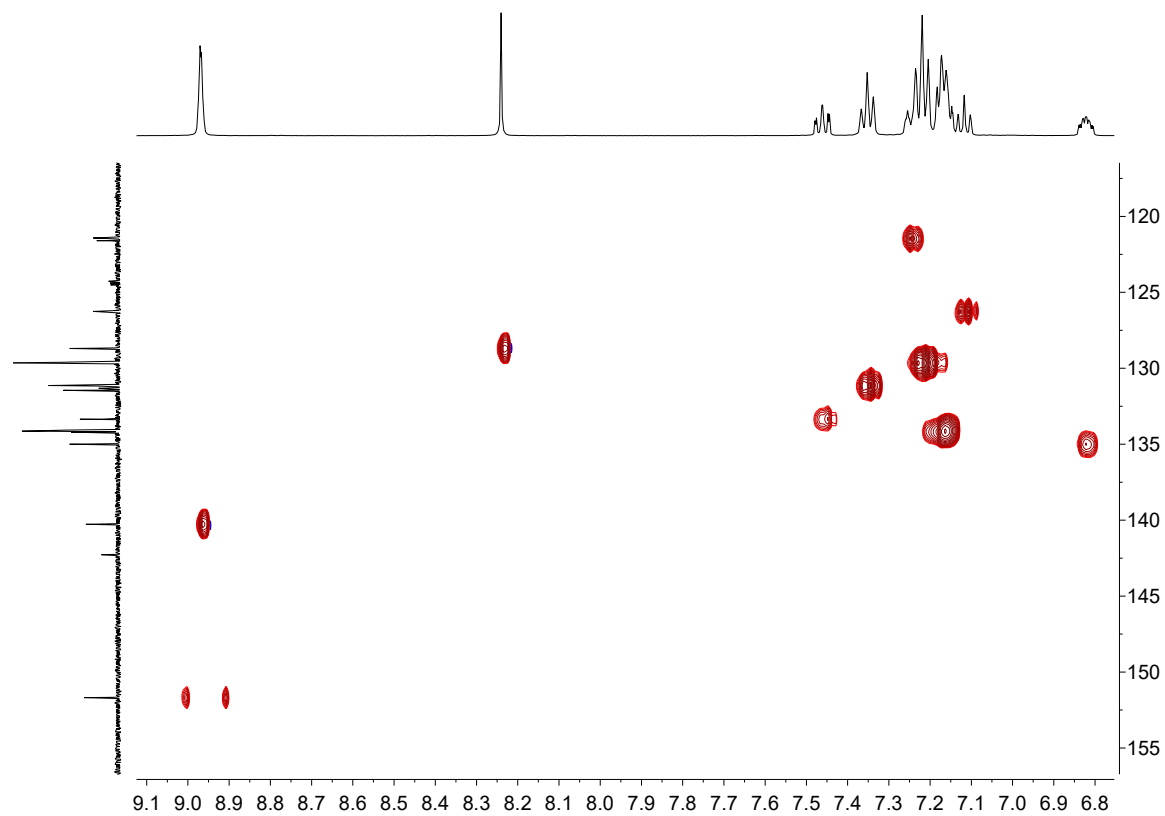

Fig. S12. HMQC spectrum (500 MHz  $^1\text{H}$ , 126 MHz  $^{13}\text{C}\{^1\text{H}\}$ , acetone- $d_6$ , 298 K) of  $[\text{Cu}(\text{POP})(3,8\text{-Br}_2\text{phen})][\text{PF}_6]$ .

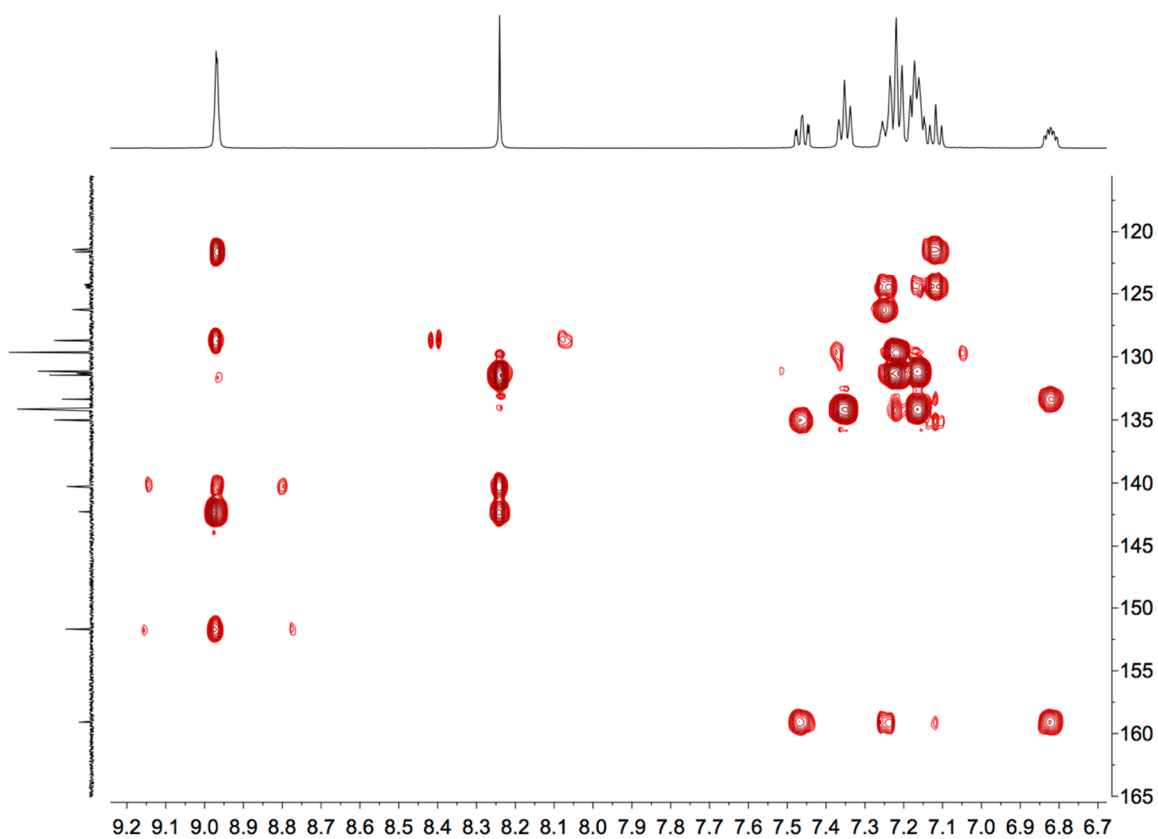

Fig. S13. HMBC spectrum (500 MHz  $^1\text{H}$ , 126 MHz  $^{13}\text{C}\{^1\text{H}\}$ , acetone- $d_6$ , 298 K) of  $[\text{Cu}(\text{POP})(3,8\text{-Br}_2\text{phen})][\text{PF}_6]$ .

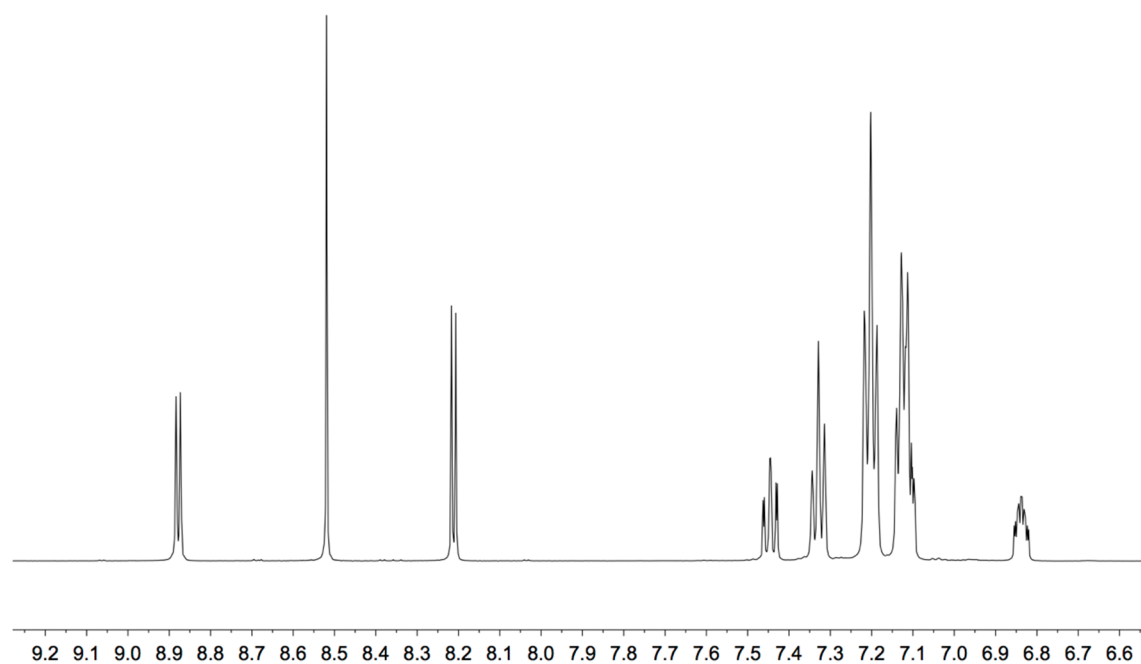

Fig. S14. Aromatic region of the  $^1\text{H}$  NMR spectrum (500 MHz, acetone- $d_6$ , 298 K) of  $[\text{Cu}(\text{POP})(4,7\text{-Br}_2\text{phen})][\text{PF}_6]$ .

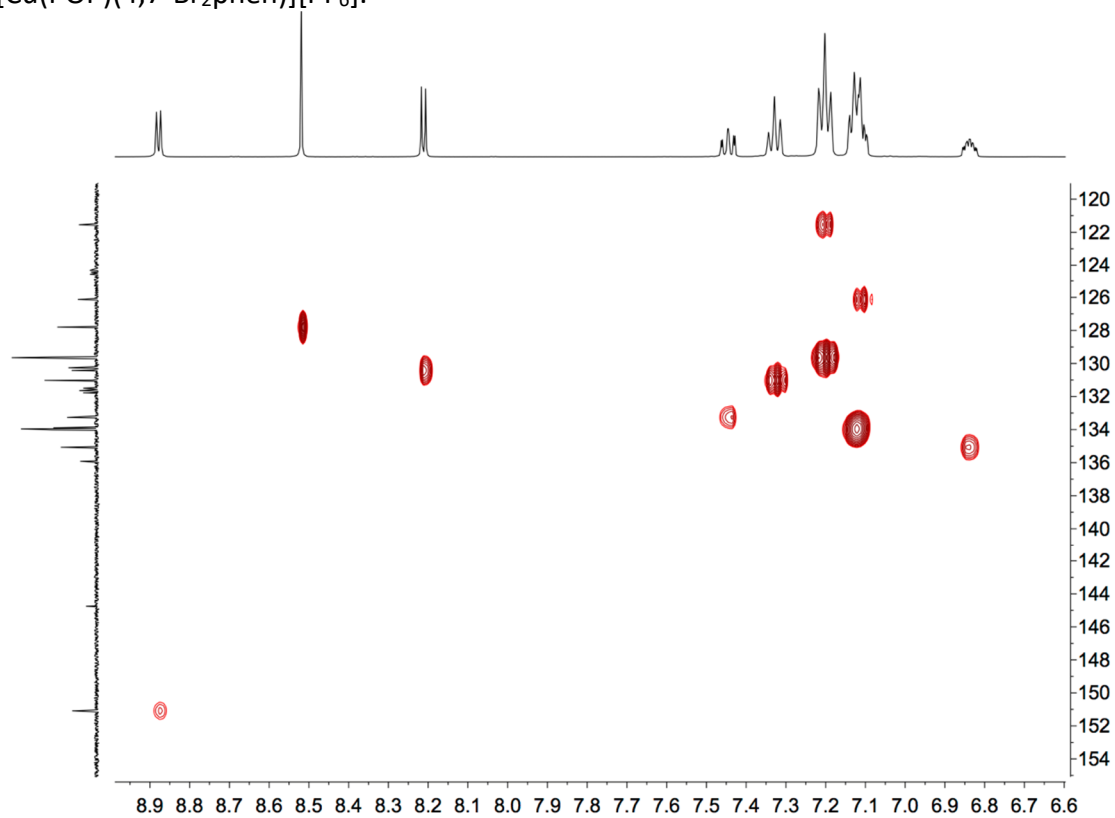



Fig. S15. HMQC spectrum (500 MHz  $^1\text{H}$ , 126 MHz  $^{13}\text{C}\{^1\text{H}\}$ , acetone- $d_6$ , 298 K) of  $[\text{Cu}(\text{POP})(4,7\text{-Br}_2\text{phen})][\text{PF}_6]$ .

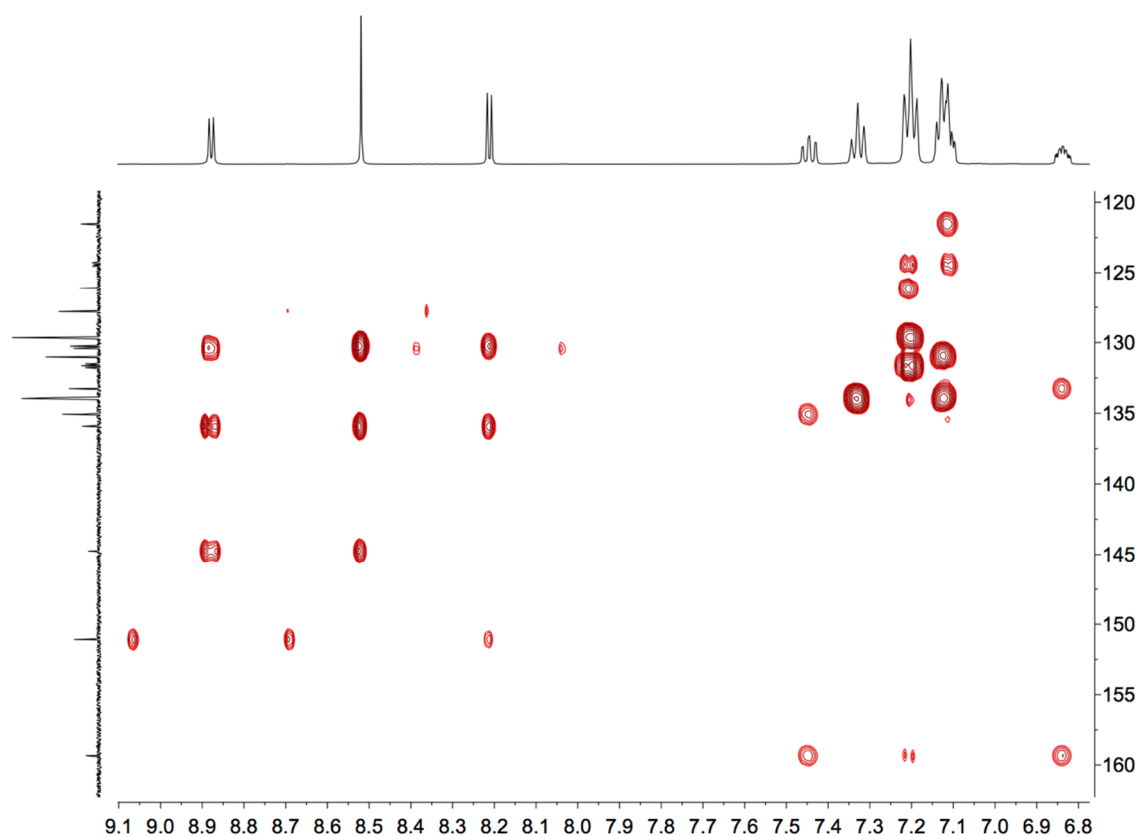

Fig. S16. HMBC spectrum (500 MHz  $^1\text{H}$ , 126 MHz  $^{13}\text{C}\{^1\text{H}\}$ , acetone- $d_6$ , 298 K) of  $[\text{Cu}(\text{POP})(4,7\text{-Br}_2\text{phen})][\text{PF}_6]$ .

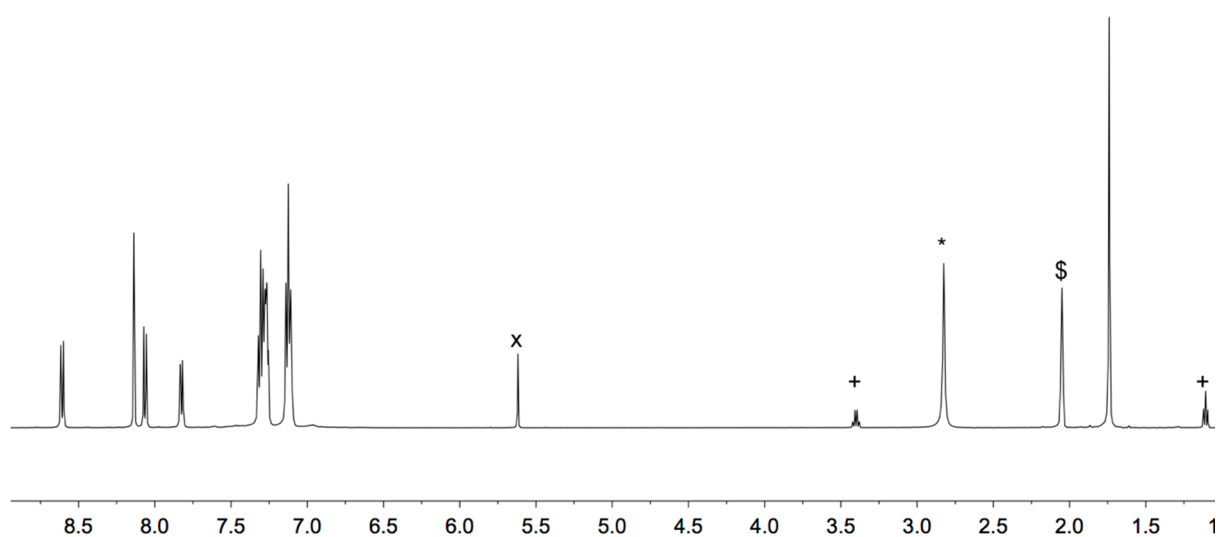

Fig. S17.  $^1\text{H}$  NMR spectrum (500 MHz, acetone- $d_6$ , 298 K) of  $[\text{Cu}(\text{xantphos})(2,9\text{-Br}_2\text{phen})][\text{PF}_6]$ . \$ = acetone- $d_5$ ; \* =  $\text{H}_2\text{O}$ ; + =  $\text{Et}_2\text{O}$ ; x =  $\text{CH}_2\text{Cl}_2$ .

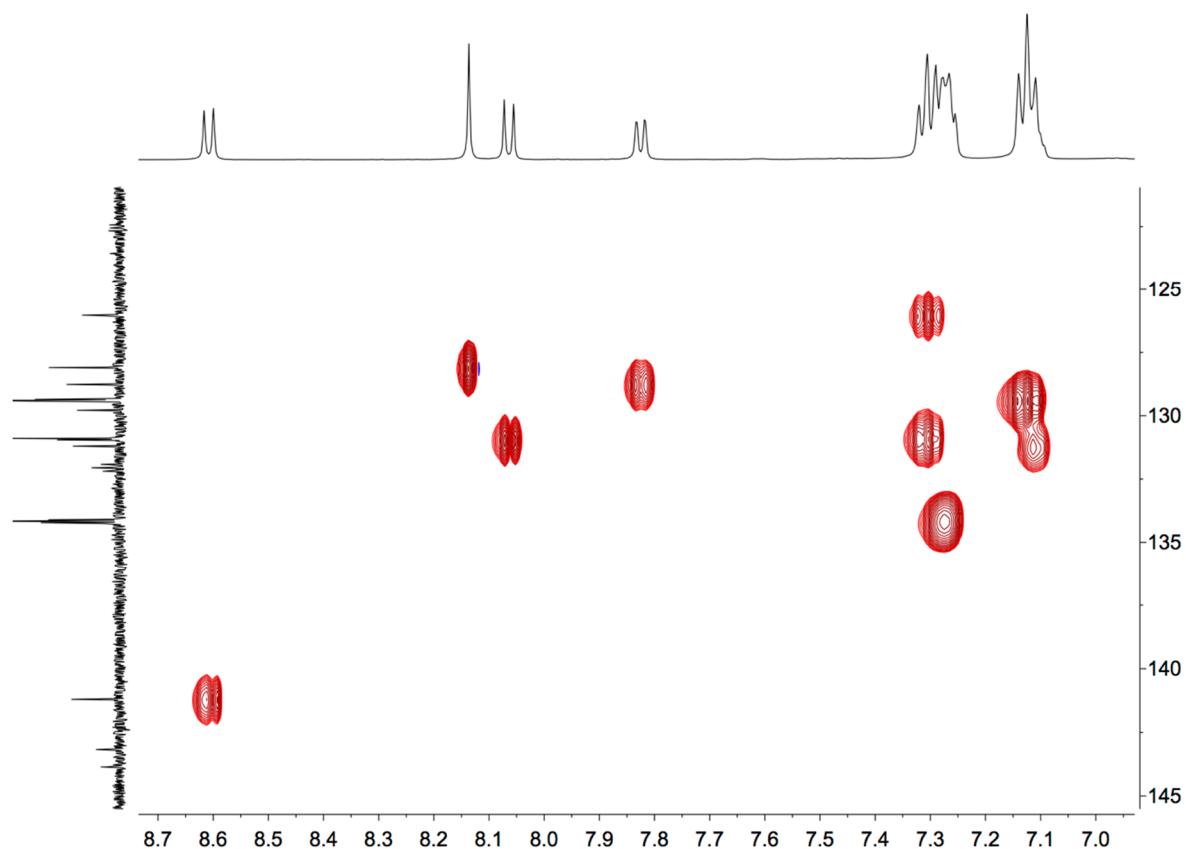

Fig. S18. HMQC spectrum (aromatic region, 500 MHz  $^1\text{H}$ , 126 MHz  $^{13}\text{C}\{^1\text{H}\}$ , acetone- $d_6$ , 298 K) of  $[\text{Cu}(\text{xantphos})(2,9\text{-Br}_2\text{phen})][\text{PF}_6]$ .

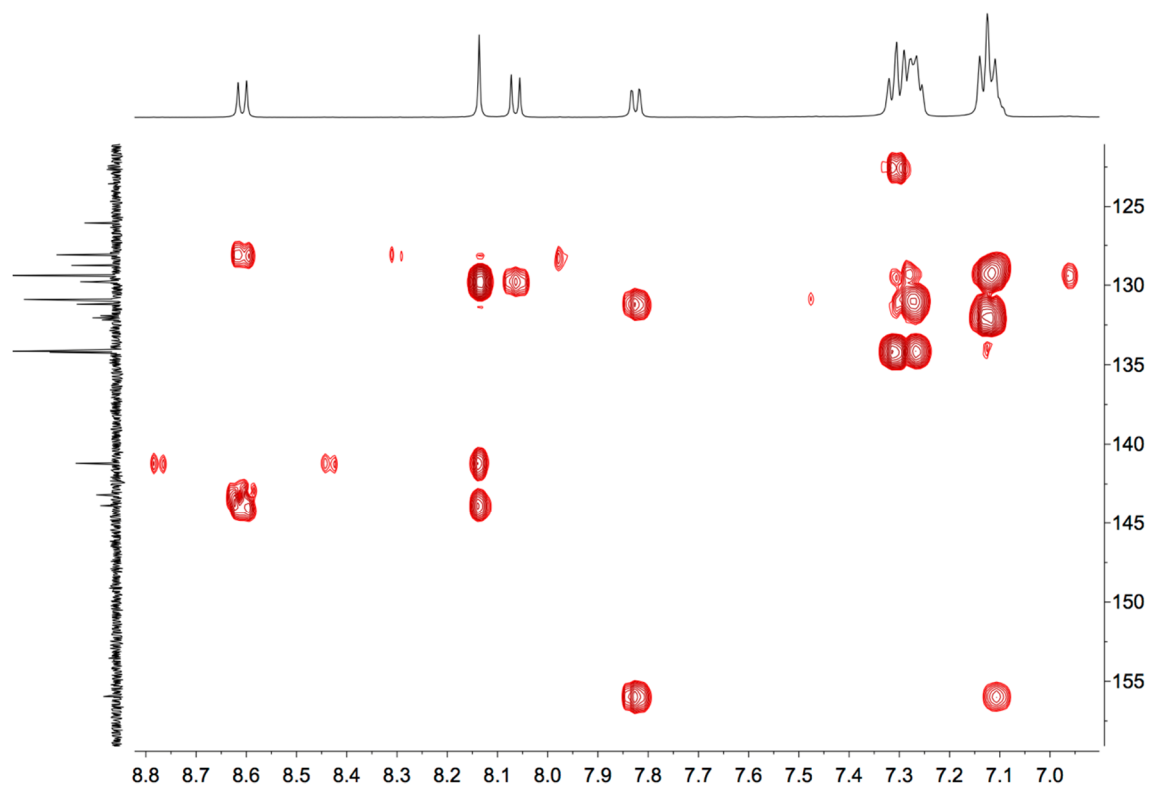

Fig. S19. HMBC spectrum (aromatic region, 500 MHz  $^1\text{H}$ , 126 MHz  $^{13}\text{C}\{^1\text{H}\}$ , acetone- $d_6$ , 298 K) of  $[\text{Cu}(\text{xantphos})(2,9\text{-Br}_2\text{phen})][\text{PF}_6]$ .

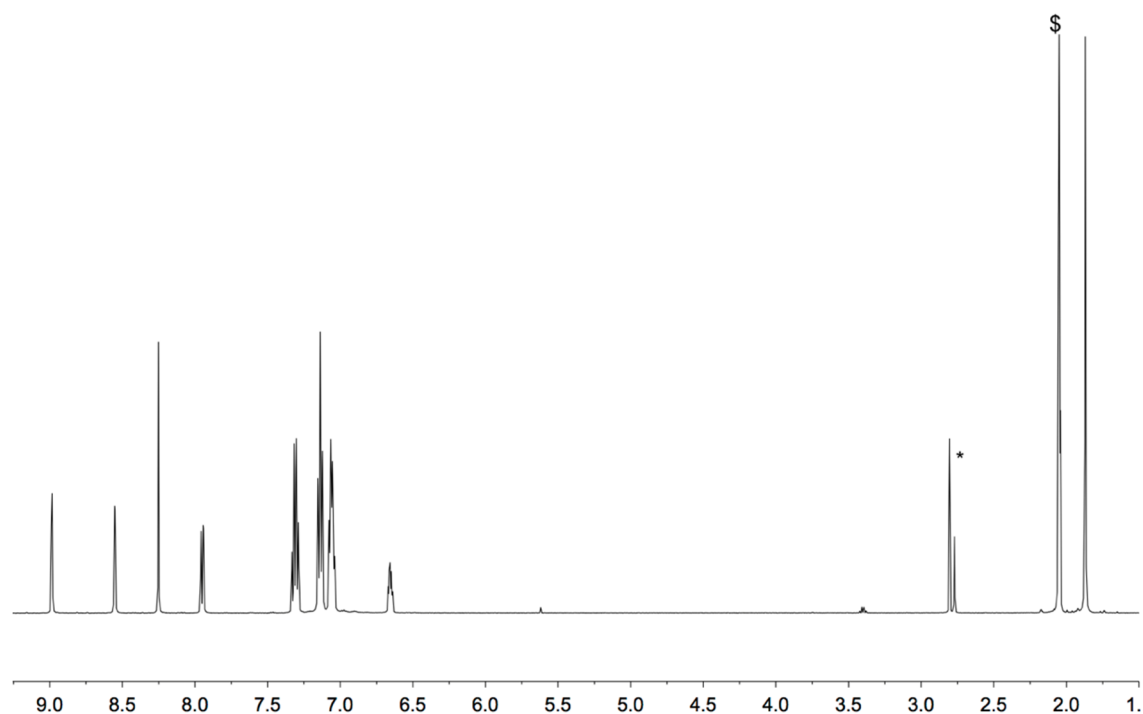

Fig. S20.  $^1\text{H}$  NMR spectrum (500 MHz, acetone- $d_6$ , 298 K) of  $[\text{Cu}(\text{xantphos})(3,8\text{-Br}_2\text{phen})][\text{PF}_6]$ . \$ = acetone- $d_5$ ; \* =  $\text{H}_2\text{O}$  and HOD.

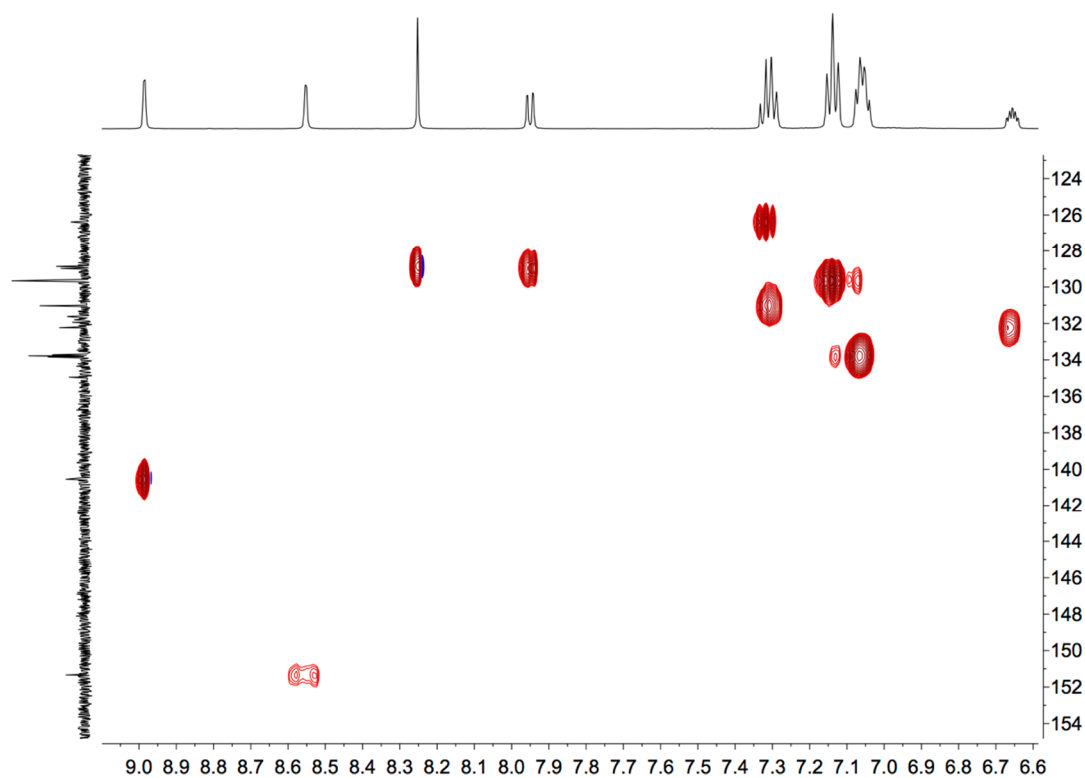

Fig. S21. HMQC spectrum (aromatic region, 500 MHz  $^1\text{H}$ , 126 MHz  $^{13}\text{C}\{^1\text{H}\}$ , acetone- $d_6$ , 298 K) of  $[\text{Cu}(\text{xantphos})(3,8\text{-Br}_2\text{phen})][\text{PF}_6]$ .

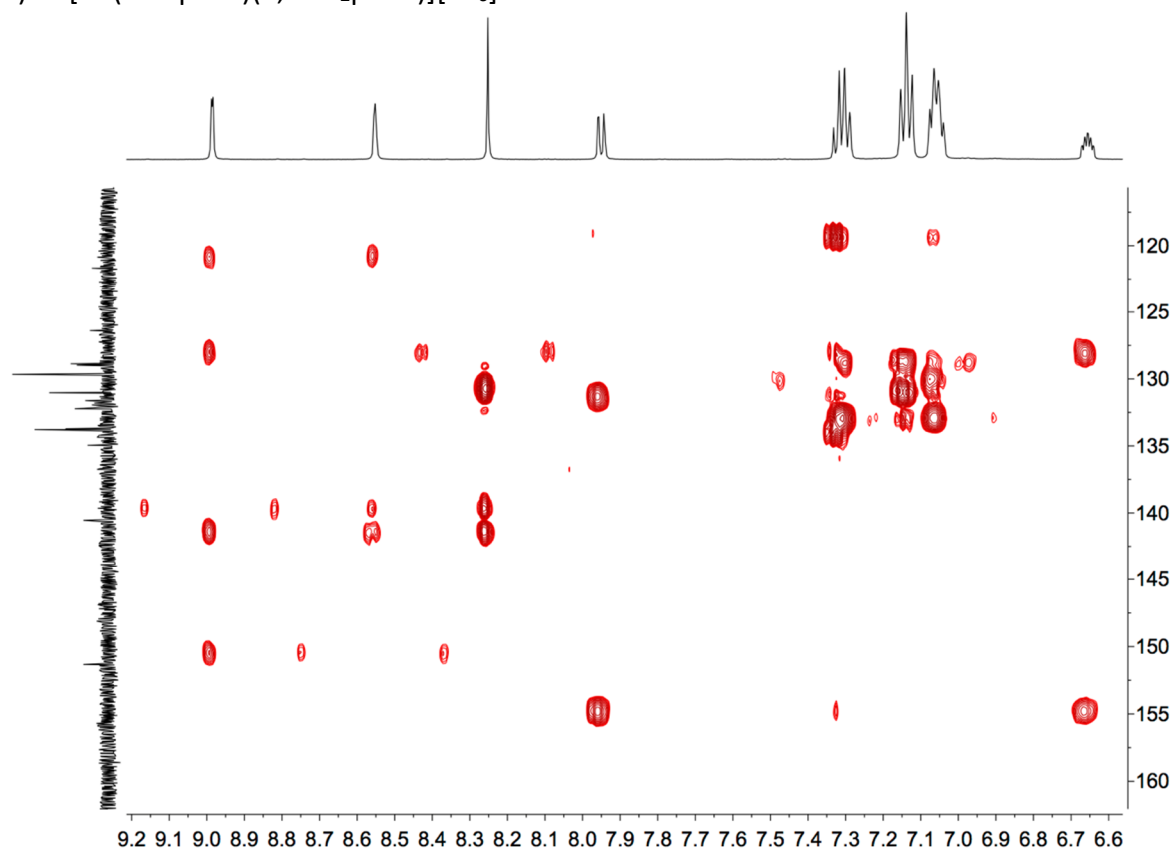

Fig. S22. HMBC spectrum (aromatic region, 500 MHz  $^1\text{H}$ , 126 MHz  $^{13}\text{C}\{^1\text{H}\}$ , acetone- $d_6$ , 298 K) of  $[\text{Cu}(\text{xantphos})(3,8\text{-Br}_2\text{phen})][\text{PF}_6]$ .

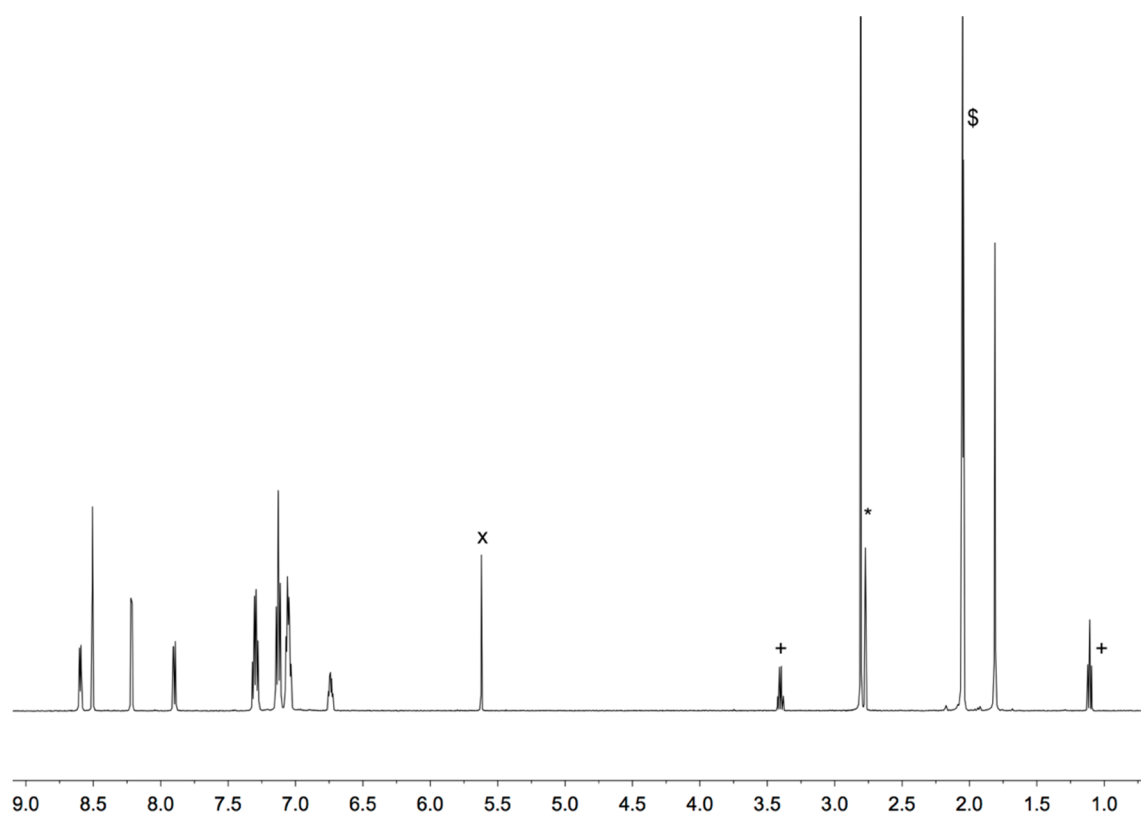

Fig. S23.  $^1\text{H}$  NMR spectrum (500 MHz, acetone- $d_6$ , 298 K) of  $[\text{Cu}(\text{xantphos})(4,7\text{-Br}_2\text{phen})][\text{PF}_6]$ .  $\$$  = acetone- $d_5$ ; \* =  $\text{H}_2\text{O}$  and  $\text{HOD}$ ; x =  $\text{CH}_2\text{Cl}_2$ ; + =  $\text{Et}_2\text{O}$ .

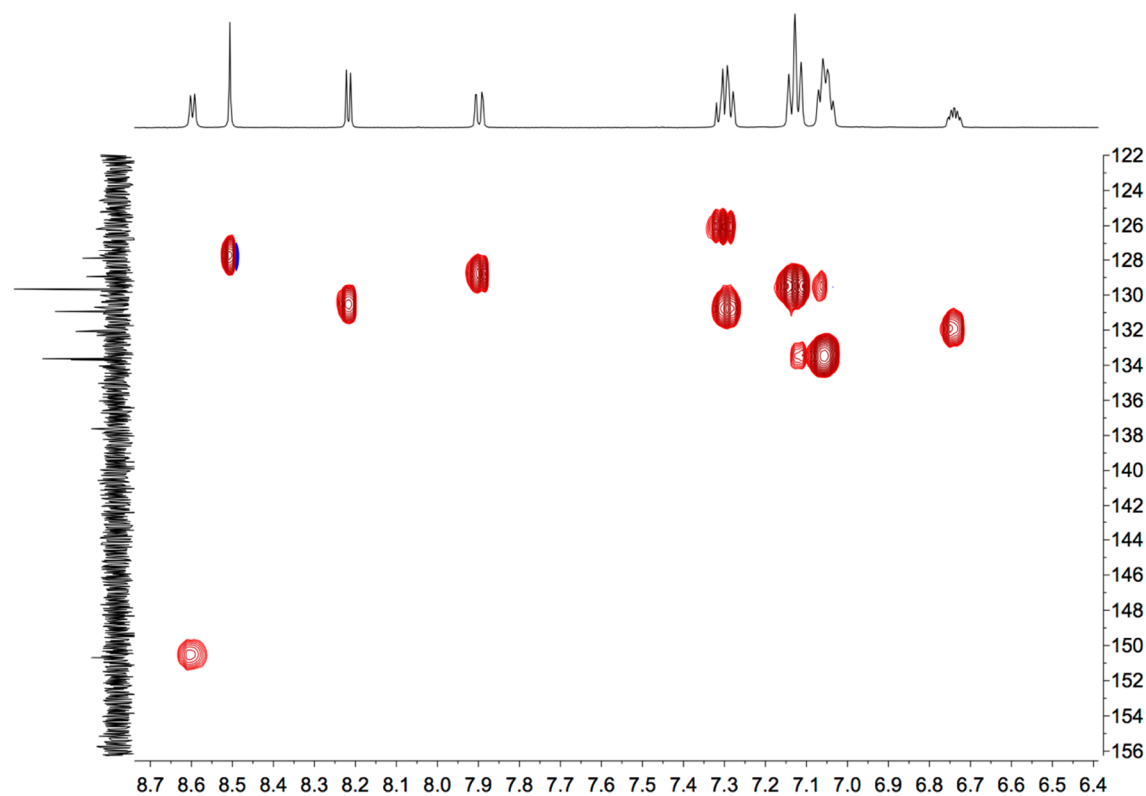

Fig. S24. HMQC spectrum (aromatic region, 500 MHz  $^1\text{H}$ , 126 MHz  $^{13}\text{C}\{^1\text{H}\}$ , acetone- $d_6$ , 298 K) of  $[\text{Cu}(\text{xantphos})(4,7\text{-Br}_2\text{phen})][\text{PF}_6]$ .

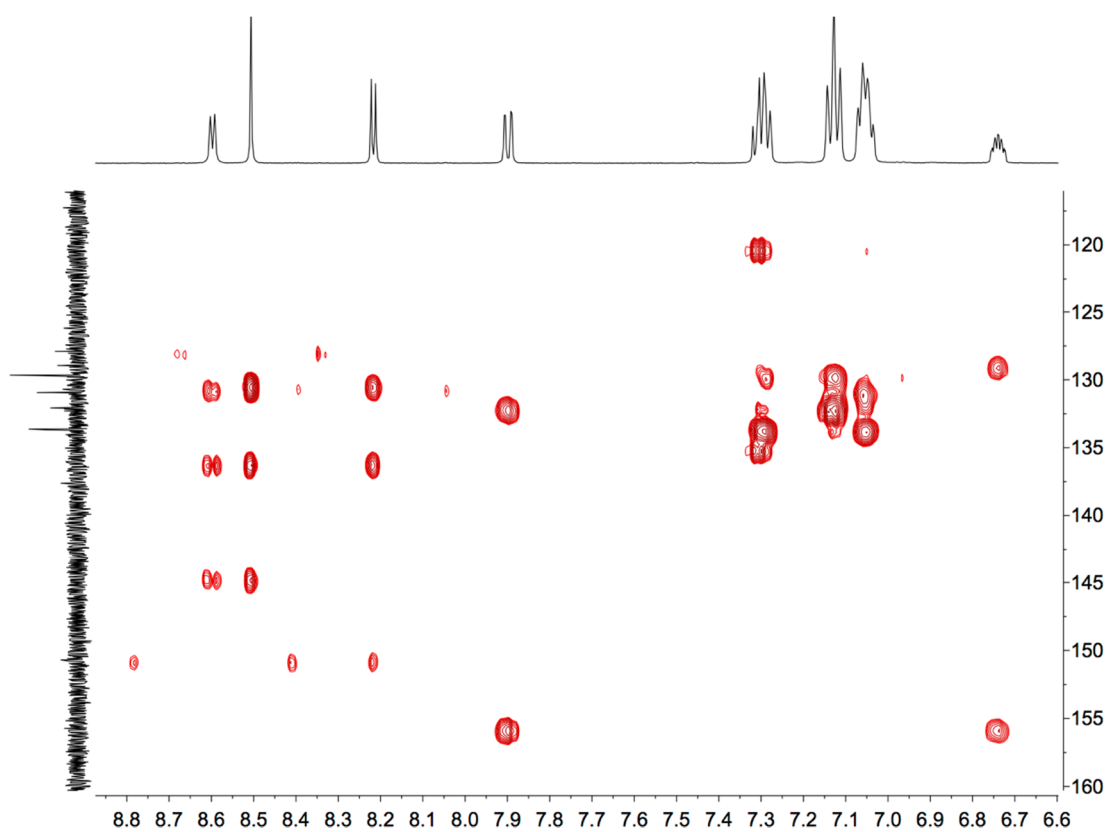

Fig. S25. HMBC spectrum (aromatic region, 500 MHz  $^1\text{H}$ , 126 MHz  $^{13}\text{C}\{^1\text{H}\}$ , acetone- $d_6$ , 298 K) of  $[\text{Cu}(\text{xantphos})(4,7\text{-Br}_2\text{phen})][\text{PF}_6]$ .

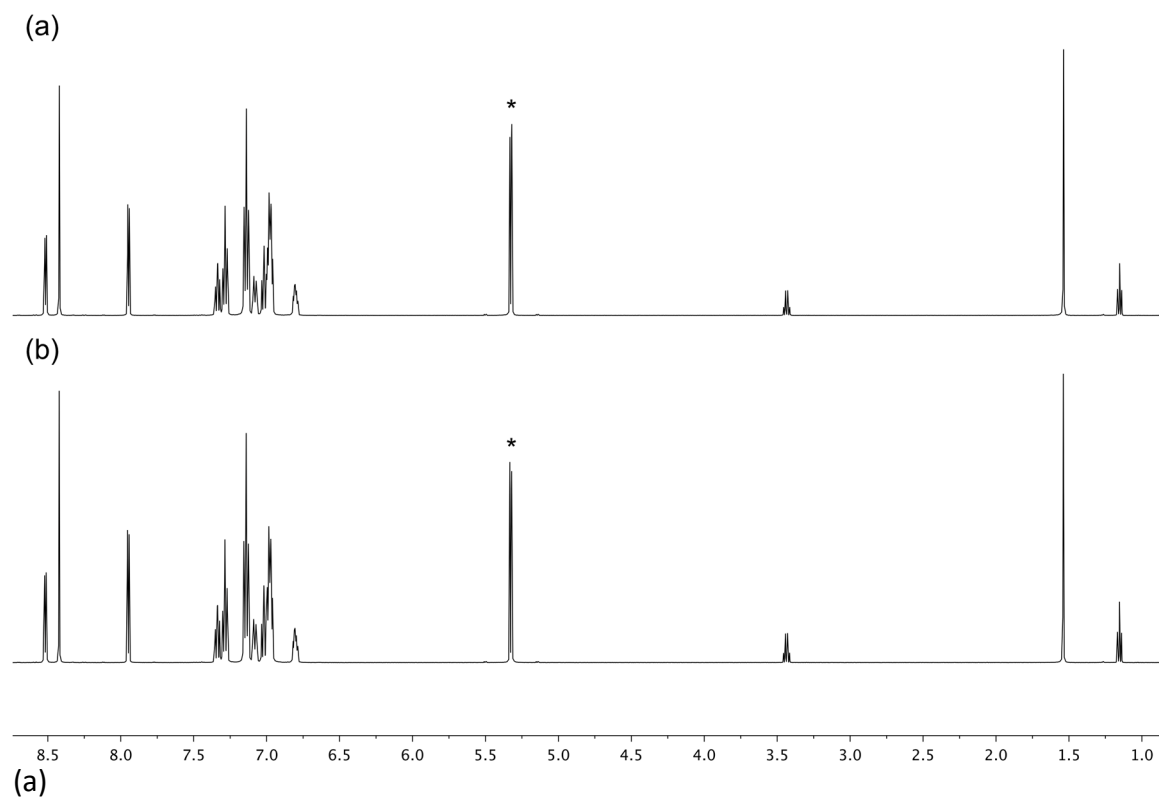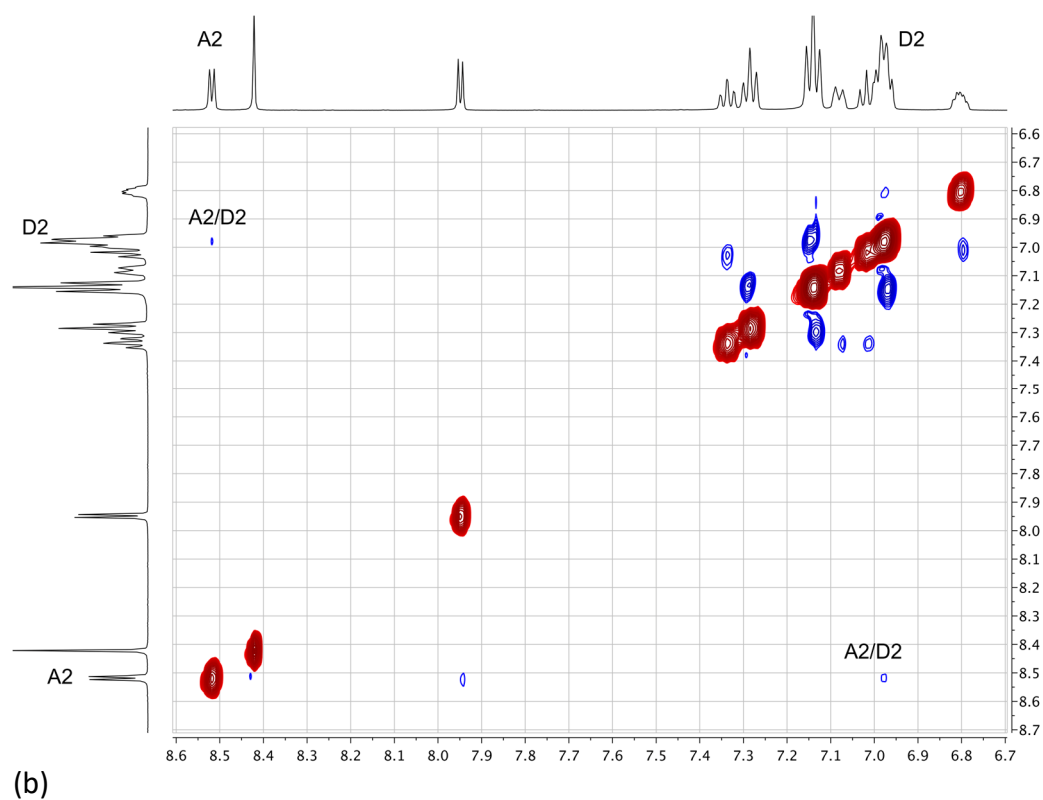

Fig. S26. (a)  $^1\text{H}$  NMR spectrum (500 MHz,  $\text{CD}_2\text{Cl}_2$ , 298 K, aromatic region) of  $[\text{Cu}(\text{POP})(4,7\text{-Br}_2\text{phen})][\text{PF}_6]$ : (a) after freshly preparing the NMR sample and (b) after 6 hours standing at room temperature. (b) NOESY spectrum (500 MHz,  $\text{CD}_2\text{Cl}_2$ , 298 K, aromatic region) of  $[\text{Cu}(\text{POP})(4,7\text{-Br}_2\text{phen})][\text{PF}_6]$ .

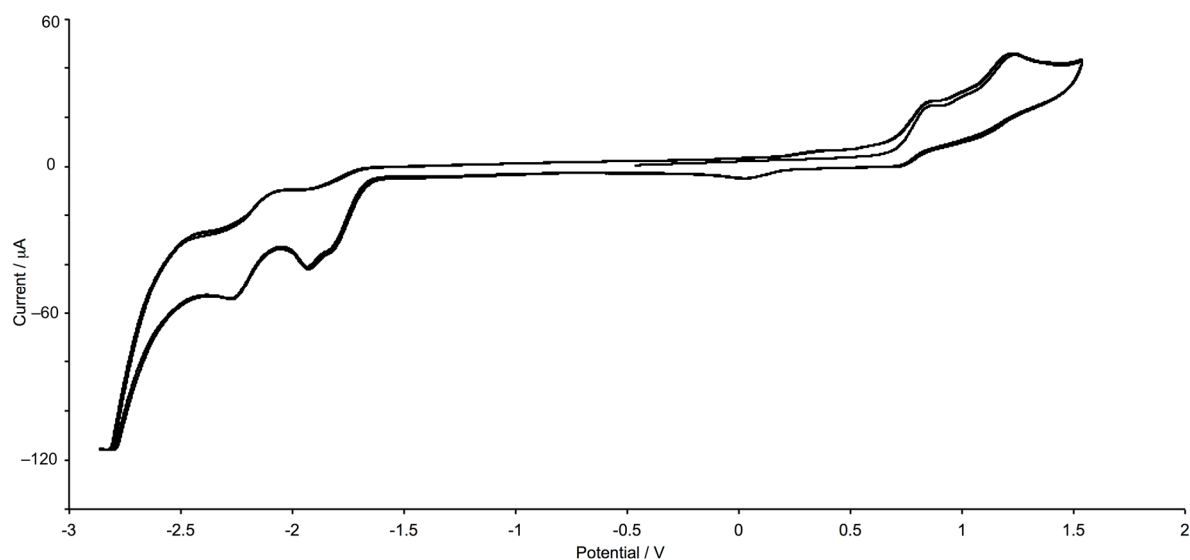

Fig. S27. Representative CV showing two successive cycles for  $[\text{Cu}(\text{POP})(4,7\text{-Br}_2\text{phen})][\text{PF}_6]$ . Referenced to internal  $\text{Fc}/\text{Fc}^+ = 0.0\text{ V}$ ;  $\text{CH}_2\text{Cl}_2$  solution with  $[\text{nBu}_4\text{N}][\text{PF}_6]$  as supporting electrolyte and scan rate of  $0.1\text{ V s}^{-1}$ .

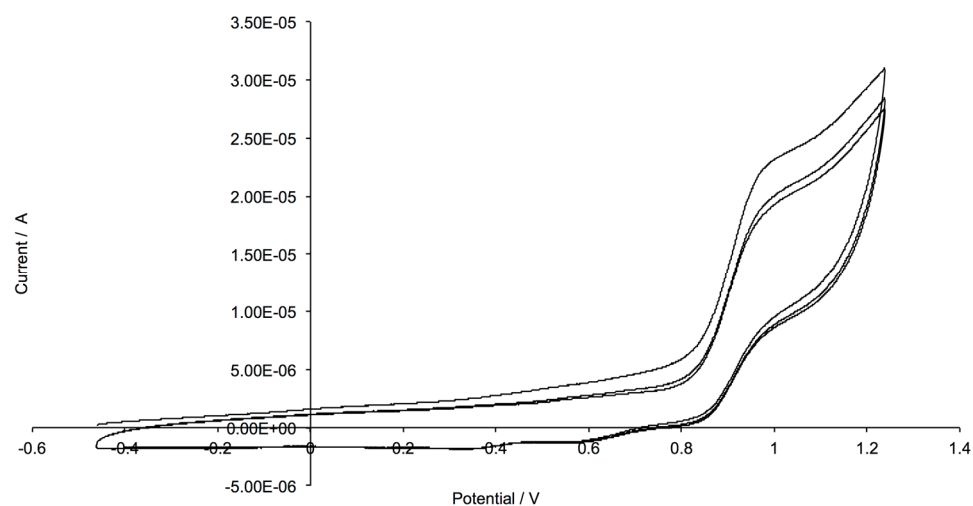

(a)

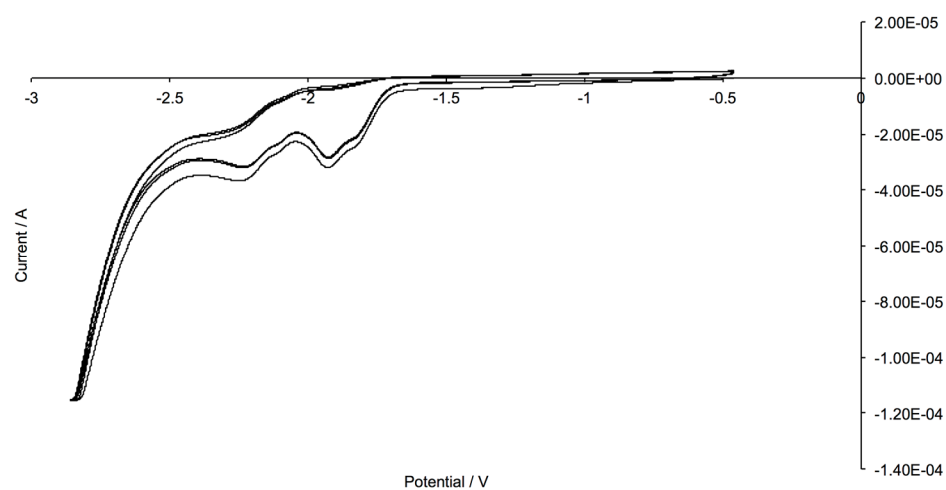

(b)

Fig. S28. Successive cycles in the (a) anodic and (b) cathodic scans for  $[\text{Cu}(\text{POP})(2,9\text{-Br}_2\text{phen})][\text{PF}_6]$ . Referenced to internal  $\text{Fc}/\text{Fc}^+ = 0.0 \text{ V}$ ;  $\text{CH}_2\text{Cl}_2$  solution with  $[\text{nBu}_4\text{N}][\text{PF}_6]$  as supporting electrolyte and scan rate of  $0.1 \text{ V s}^{-1}$ .



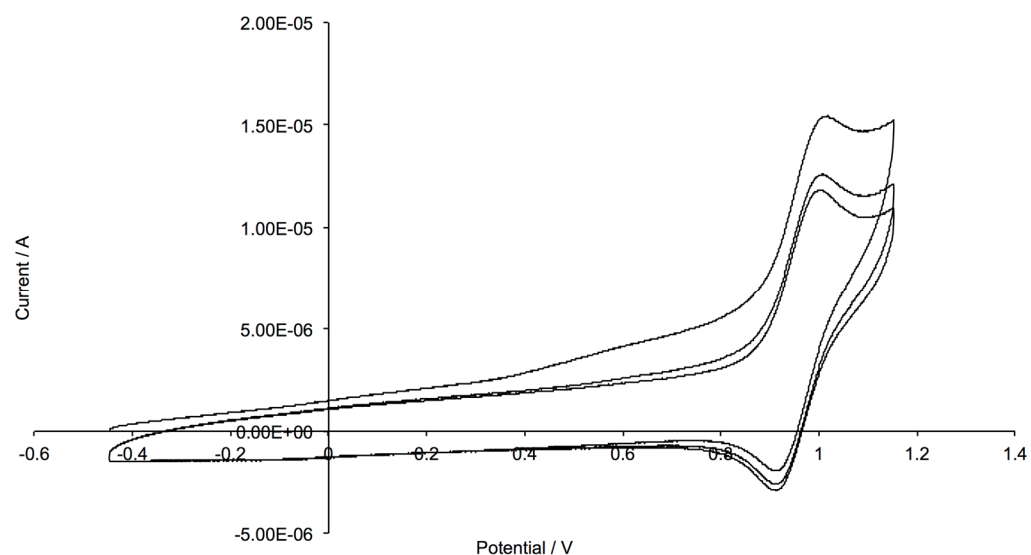

(a)

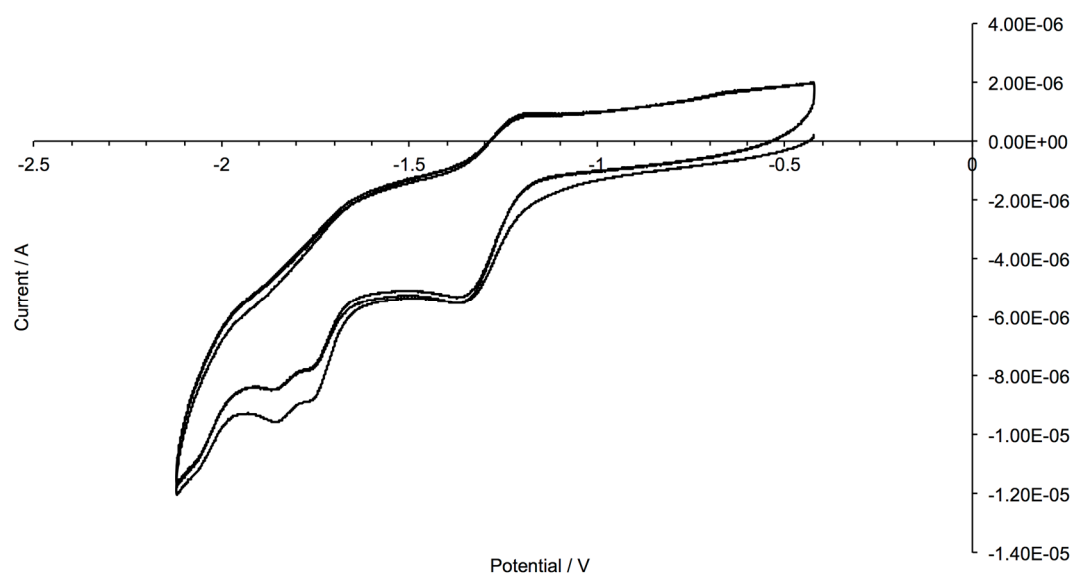

(b)

Fig. S29. Successive cycles in the (a) anodic and (b) cathodic scans for  $[\text{Cu}(\text{xantphos})(2,9\text{-Br}_2\text{phen})][\text{PF}_6]$ . Referenced to internal  $\text{Fc}/\text{Fc}^+ = 0.0 \text{ V}$ ;  $\text{CH}_2\text{Cl}_2$  solution with  $[\text{nBu}_4\text{N}][\text{PF}_6]$  as supporting electrolyte and scan rate of  $0.1 \text{ V s}^{-1}$ .

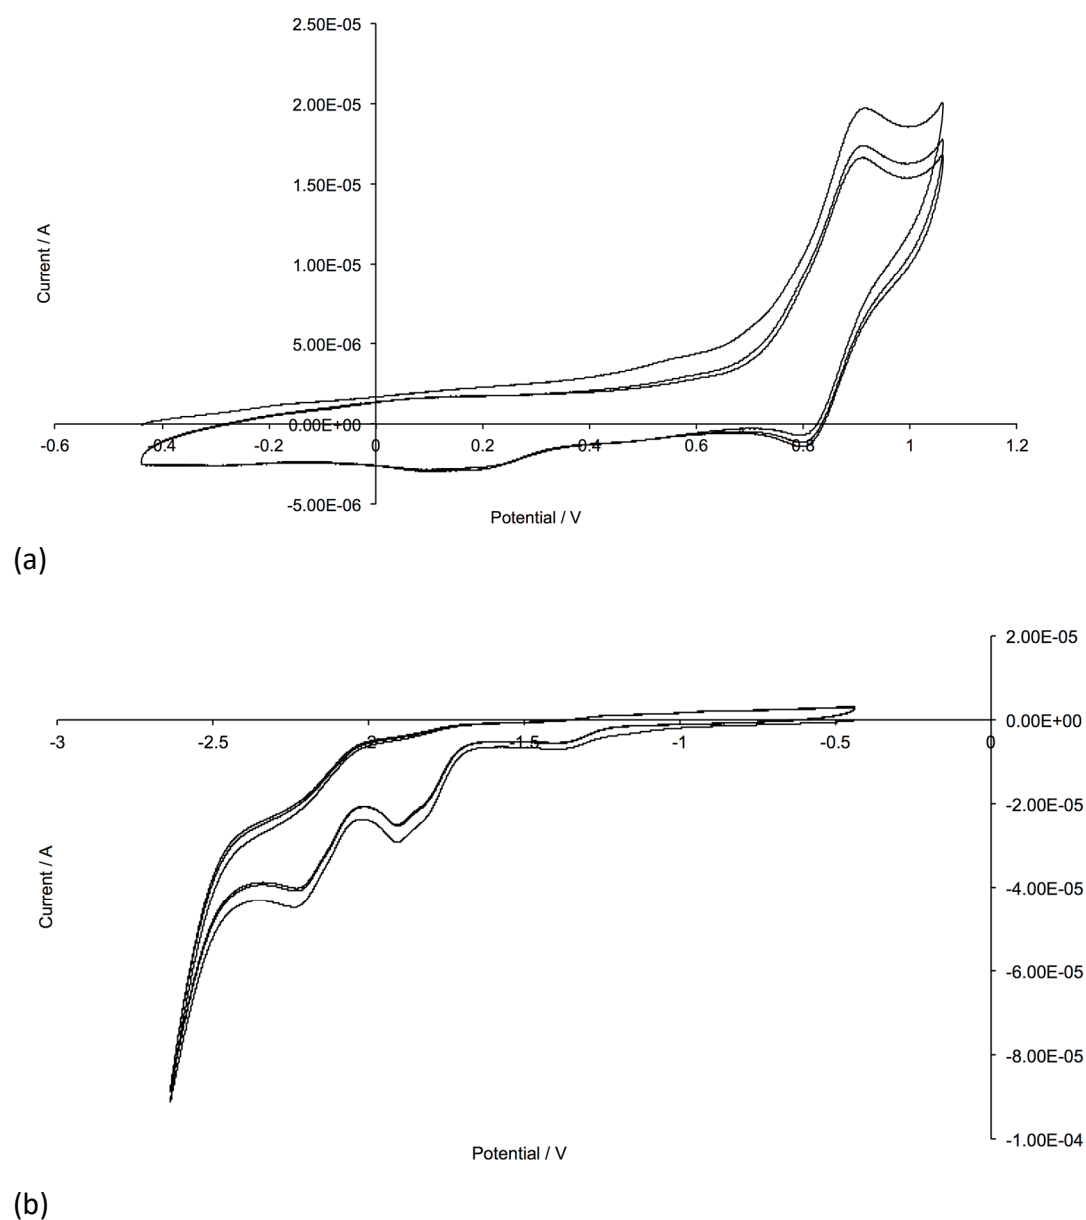

Fig. S30. Successive cycles in the (a) anodic and (b) cathodic scans for  $[\text{Cu}(\text{POP})(3,8\text{-Br}_2\text{phen})][\text{PF}_6]$ . Referenced to internal  $\text{Fc}/\text{Fc}^+ = 0.0\text{ V}$ ;  $\text{CH}_2\text{Cl}_2$  solution with  $[\text{nBu}_4\text{N}][\text{PF}_6]$  as supporting electrolyte and scan rate of  $0.1\text{ V s}^{-1}$ .

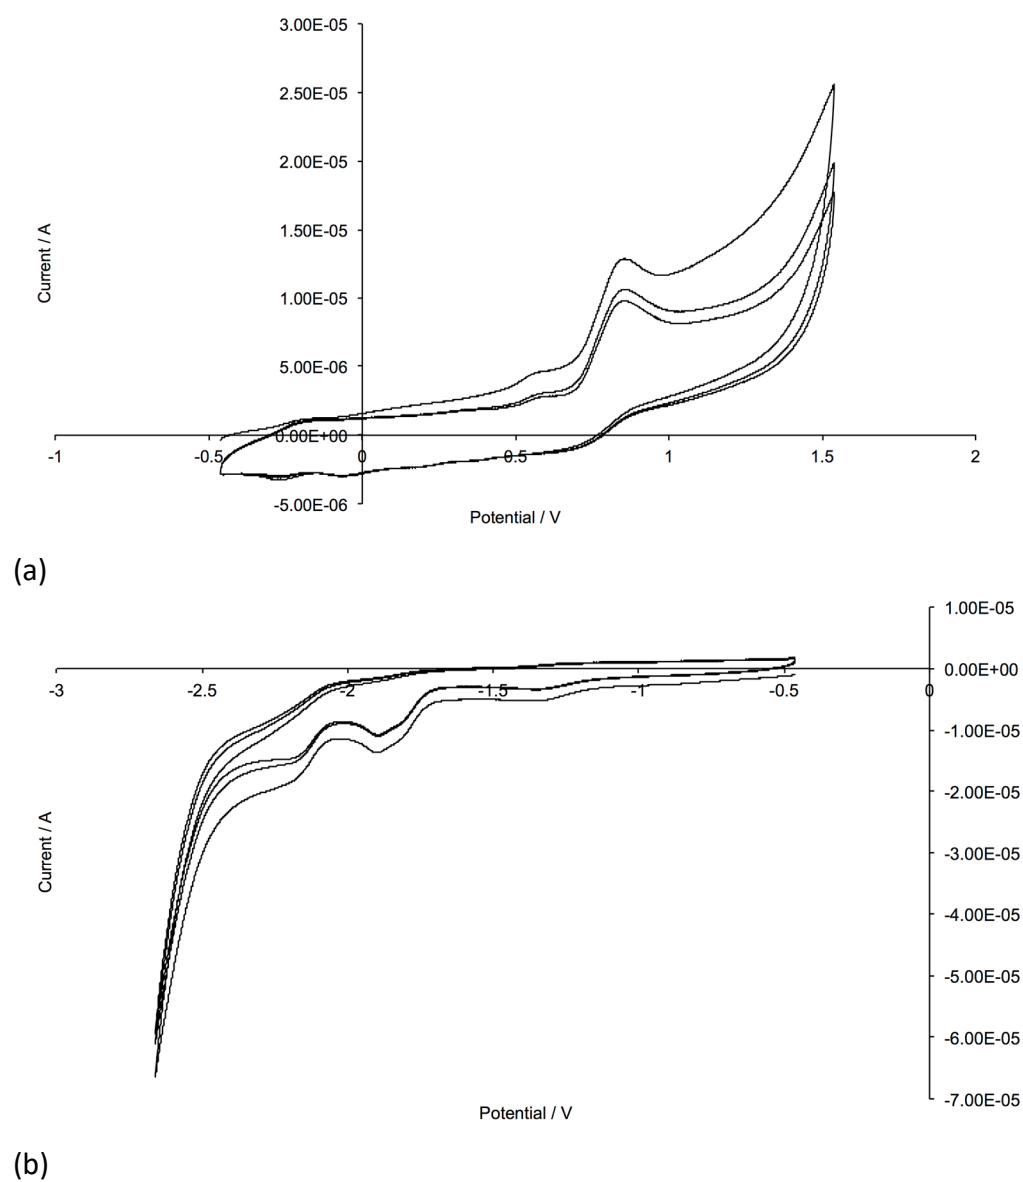

Fig. S31. Successive cycles in the (a) anodic and (b) cathodic scans for  $[\text{Cu}(\text{xantphos})(3,8\text{-Br}_2\text{phen})][\text{PF}_6]$ . Referenced to internal  $\text{Fc}/\text{Fc}^+ = 0.0$  V;  $\text{CH}_2\text{Cl}_2$  solution with  $[\text{nBu}_4\text{N}][\text{PF}_6]$  as supporting electrolyte and scan rate of  $0.1 \text{ V s}^{-1}$ .

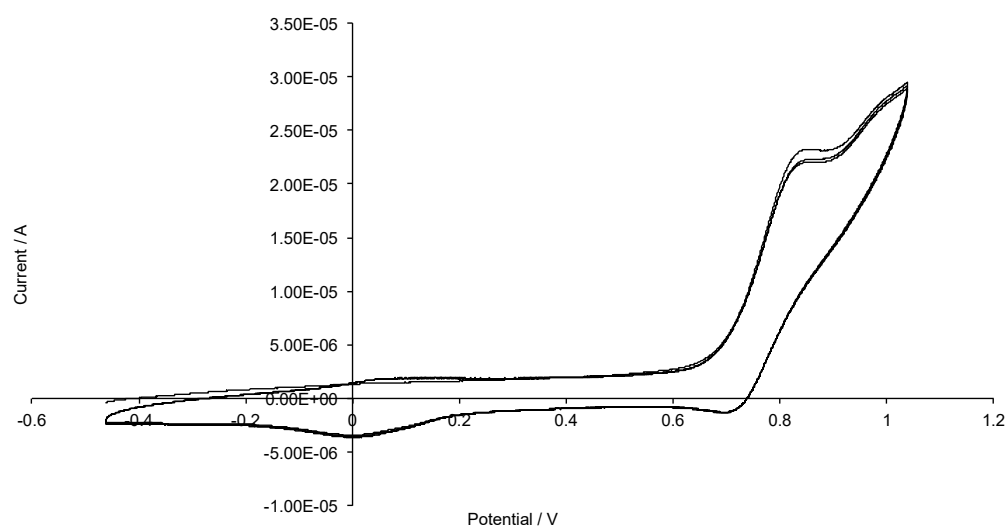

(a)

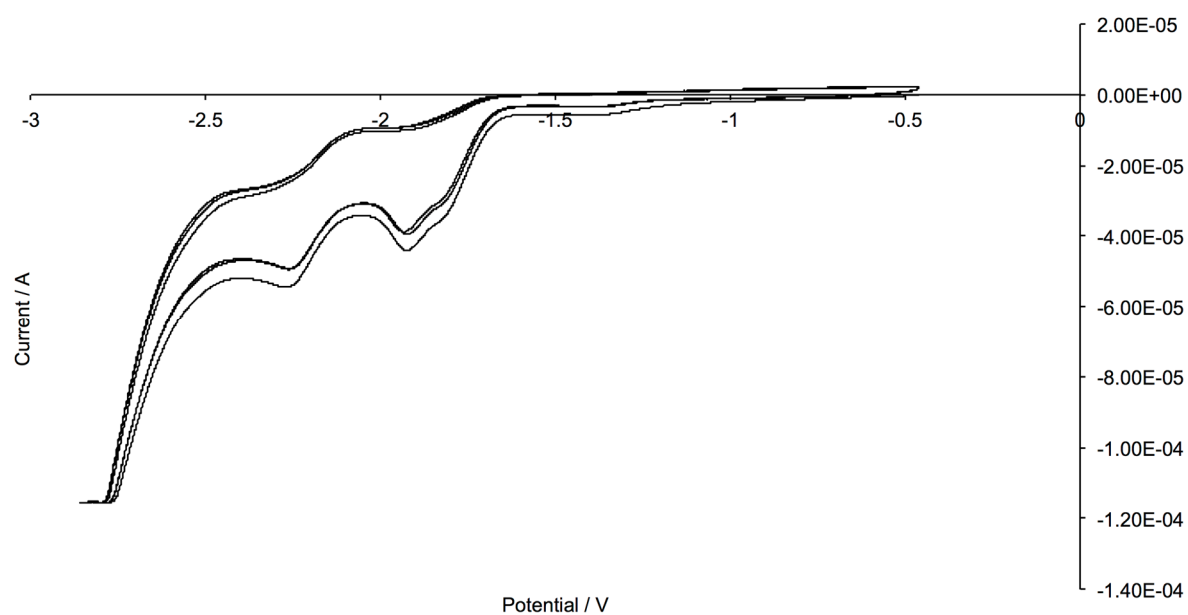

(b)

Fig. S32. Successive cycles in the (a) anodic and (b) cathodic scans for  $[\text{Cu}(\text{POP})(4,7\text{-Br}_2\text{phen})][\text{PF}_6]$ . Referenced to internal  $\text{Fc}/\text{Fc}^+ = 0.0 \text{ V}$ ;  $\text{CH}_2\text{Cl}_2$  solution with  $[\text{nBu}_4\text{N}][\text{PF}_6]$  as supporting electrolyte and scan rate of  $0.1 \text{ V s}^{-1}$ .

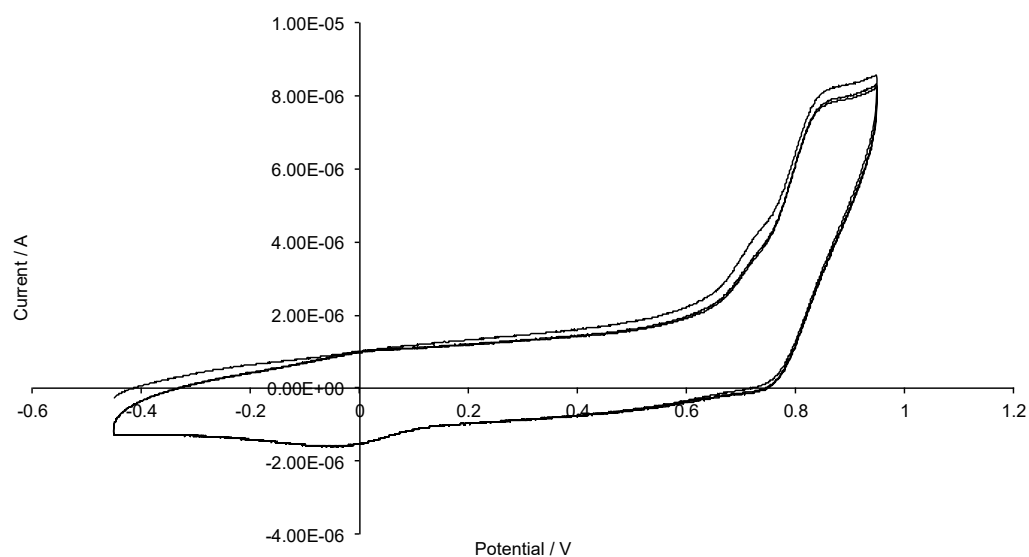

(a)

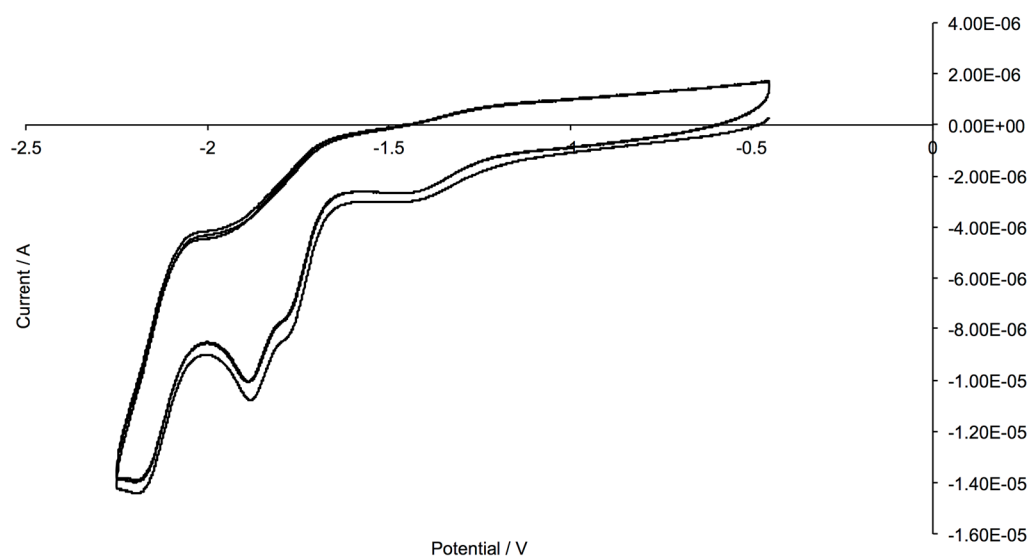

(b)

Fig. S33. Successive cycles in the (a) anodic and (b) cathodic scans for  $[\text{Cu}(\text{xantphos})(4,7\text{-Br}_2\text{phen})][\text{PF}_6]$ . Referenced to internal  $\text{Fc}/\text{Fc}^+ = 0.0 \text{ V}$ ;  $\text{CH}_2\text{Cl}_2$  solution with  $[\text{nBu}_4\text{N}][\text{PF}_6]$  as supporting electrolyte and scan rate of  $0.1 \text{ V s}^{-1}$ .
